# Supplementary material for: Enhanced crystal network and charge transfer of non-fused ring electron acceptors via interchain interaction for efficient and stable organic solar cells
Source: Royal Society of Chemistry journal article supplement (doi:10.1039/d4ee02027h), 2024-01-01
Supplement: d4ee02027h1.pdf [file d4ee02027h1.pdf]

## Electronic Supplementary Information for

### **Enhanced crystal network and charge transfer of non-fused ring electron acceptor via interchain interaction enable efficient and stable organic solar cells**

Shounuan Ye,<sup>‡a</sup> Tianyi Chen,<sup>‡a</sup> Jinyang Yu,<sup>a</sup> Shanlu Wang,<sup>a</sup> Shuixing Li,<sup>\*b</sup> Jingxi Wang,<sup>a</sup> Yuang Fu,<sup>c</sup> Yuxuan Zhu,<sup>d</sup> Mengting Wang,<sup>a</sup> Xinhui Lu,<sup>c</sup> Zaifei Ma,<sup>d</sup> Chang-Zhi Li,<sup>a</sup> Minmin Shi<sup>\*a</sup> and Hongzheng Chen<sup>\*ab</sup>

<sup>a</sup> MOE Key Laboratory of Macromolecular Synthesis and Functionalization, State Key Laboratory of Silicon and Advanced Semiconductor Materials, Department of Polymer Science and Engineering, Zhejiang University, Hangzhou 310027, P. R. China. E-mail: minminshi@zju.edu.cn; hzchen@zju.edu.cn

<sup>b</sup> Zhejiang University-Hangzhou Global Scientific and Technological Innovation Center, Hangzhou 311200, P. R. China. E-mail: lishuixing89@zju.edu.cn

<sup>c</sup> Department of Physics, The Chinese University of Hong Kong, Hong Kong 999077, P. R. China

<sup>d</sup> State Key Laboratory for Modification of Chemical Fibers and Polymer Materials, Center for Advanced Low-dimension Materials, College of Materials Science and Engineering, Donghua University, Shanghai 201620, P. R. China

<sup>‡</sup> S. Ye. and T. Chen. contributed equally to this work.

## Characterization

### NMR & MS

<sup>1</sup>H-NMR spectra were obtained on a Bruker Advance III 400 (400 MHz) NMR spectroscope. Matrix-assisted laser desorption/ionization time-of-flight (MALDI-TOF) mass spectrum tests were carried out on a Bruker Ultraflextreme MALDI-TOF/TOF mass spectrometry.

### Thermal Analysis

Thermogravimetric analysis (TGA) was done on a WCT-2 thermal balance under N<sub>2</sub> atmosphere at a heating rate of 10 °C/min. Differential scanning calorimetry (DSC) was recorded on a Pekin-Elmer Pyris 1 differential scanning calorimeter.

### Density functional theory (DFT)

Density functional theory calculations were conducted at the B3LYP/6-31G(d) level to obtain the optimized molecular geometries and frontier molecular orbitals of the acceptors. The outward *n*-octyl of the three acceptors were replaced with methyl groups for simplified calculations.

### Absorption & Energy Levels

UV-vis absorption spectra were recorded on a HITACHI U-4100 spectrophotometer. Cyclic voltammetry (CV) measurements were carried out on a CHI600A electrochemical workstation with Pt plate as the working electrode, Pt wire as the counter electrode, and standard calomel electrode (SCE) as the reference electrode in anhydrous acetonitrile solution containing 0.1 mol/L tetrabutylammonium hexafluorophosphate (Bu<sub>4</sub>NPF<sub>6</sub>) as the supporting electrolyte. All potentials were corrected against ferrocene/ferrocenium (Fc/Fc<sup>+</sup>) whose absolute energy level is 4.8 eV below vacuum. The equation of  $E_{\text{LUMO/HOMO}} = -e(E_{\text{red/ox}} + 4.41)$  (eV) was used to calculate the LUMO and HOMO levels (the redox potential of Fc/Fc<sup>+</sup> is found to be 0.39 V).

### Single Crystal

The crystals of acceptors were grown by solvent diffusion. Acceptor (~20 mg) was dissolved in ~2 mL CHCl<sub>3</sub> and placed in a culture tube (7 × 200 mm) with layered methanol upon it. The tube was then sealed tightly and left undisturbed for 14 days.

X-ray crystallographic data were collected at Bruker Single Crystal X-RAY Diffraction D8 Venture. The structure was solved by the intrinsic phasing method (SHELXT) and refined by the least-squares method (SHELXL) integrated in Olex2.

### Device Fabrication

Organic photovoltaics were fabricated on glass substrates commercially pre-coated with a layer of indium tin oxide (ITO) with the conventional structure of ITO/PEDOT:PSS/Active layer/PDINN/Ag. Before fabrication, the substrates were

cleaned using detergent, deionized water, acetone, and isopropanol consecutively for 10 min in each step. And then the ITO substrates were treated in the ultraviolet cleaner (UC100-SE, LEBO Science) for 10 min before being spin-coated at 4500 rpm with a layer of 10 nm thickness PEDOT:PSS (Clevios™ 4083). After baking the PEDOT:PSS layer in air at 150 °C for 10 min, the substrates were transferred to the N<sub>2</sub> glovebox. The D:A ratio is 1:1.2 (w/w) for all blends, and the total concentration is 10 mg mL<sup>-1</sup>. Heat and stir at 60 °C for 1 hour before spin coating. Then an annealing at 90 °C for 5 min was performed. A thin layer of PDINN was spin-coated from 1.5 mg mL<sup>-1</sup> methanol solution on the top of the active layer. Finally, the Ag (100 nm) electrode was deposited by thermal evaporation to complete the device with an active area of 6 mm<sup>2</sup>, and the testing aperture area is 4.572 mm<sup>2</sup>.

### ***J-V* and EQE Measurement**

The *J-V* measurement was performed via the solar simulator (SS-X50, Enlitech) and AM 1.5G spectra, calibrating the intensity of the certified standard silicon solar cell (KG2) at 100 mW cm<sup>-2</sup>. The external quantum efficiency (EQE) data were obtained using the solar-cell spectral-response measurement system (RE-R, Enlitech).

### **Space Charge Limited Current (SCLC) Measurement**

The charge carrier mobilities of the blended films were measured using the space-charge-limited current (SCLC) method. Hole-only devices were fabricated in a structure of ITO/PEDOT:PSS/Active layer/MoO<sub>3</sub>/Ag, and electron-only devices were fabricated in a structure of ITO/ZnO/Active layer/PDINN/Ag. The device characteristics were extracted by modeling the dark current under forward bias using the SCLC expression described by the Mott-Gurney law<sup>1</sup>:

$$J = \frac{9}{8} \varepsilon_r \varepsilon_0 \mu \frac{V^2}{L^3}$$

where  $\varepsilon_r \approx 3$  is the average dielectric constant of the blended film,  $\varepsilon_0$  is the permittivity of the free space,  $\mu$  is the carrier mobility,  $L$  is the thickness of the film (~100 nm), and  $V$  is the applied voltage.

### **Electroluminescence External Quantum Efficiency (EQE<sub>EL</sub>)**

A digital source meter (Keithley 2400) and a picoammeter (Keithley 6482) were used for the EQE<sub>EL</sub> measurements. The former was applied to inject electric current into the solar cells to emit the photons, which will be collected using a Si diode and form electric current that can be measured by the latter.

### **Electroluminescence (EL) Measurement**

A source meter (Keithley 2400) was employed to create the injected electric current leading to the luminescence of the solar cells. After going through an optical fiber (BFL200LS02, Thorlab), the emitted light emerged from the solar cells was collected by a fluorescence spectrometer (KYMERA-3281-B2, Andor Technology) including two sets of diffraction gratings for the wavelength range of 600~1100 nm and

900~1400 nm, and was measured by a Si EMCCD camera (DU970PBVF, Andor Technology) and an InGaAs camera (DU491A-1.7, Andor Technology), respectively.

The EL spectra were corrected for the optical losses in the fibers, the spectrometer and the cameras, using a calibrated halogen lamp (HL-3P-CAL, Ocean Optics Germany GmbH).

### **Photoluminescence (PL) Measurement**

A Supercontinuous White Laser (SuperK EXU-6, NKT photonics) and narrowband filters (LLTF Contrast SR-VIS-HP8, LLTF Contrast SR-SWIR-HP8, NKT photonics) were used to acquire the tunable excitation wavelength. After excited by the laser, the measurement processes of the emission spectra were the same as electroluminescence spectra.

The PL spectra were corrected for the optical losses as same as EL spectra. In addition, the PL spectra were also corrected for excluding the difference of the absorption ability caused by thickness between different organic layers when characterize the photoluminescence quenching efficiency.

### **Transient Absorption Spectroscopy (TAS) Measurement**

For femtosecond transient absorption spectroscopy, the fundamental output from Yb:KGW laser (1030 nm, 220 fs Gaussian fit, 100 kHz, Light Conversion Ltd) was separated to two light beams. One was introduced to NOPA (ORPHEUS-N, Light Conversion Ltd) to produce a certain wavelength for pump beam (here we use 750 nm, <math>10 \mu\text{J}/\text{cm}^2</math>), the other was focused onto a YAG plate to generate white light continuum as probe beam. The pump and probe overlapped on the sample at a small angle less than  $10^\circ$ . The transmitted probe light from sample was collected by a linear CCD array. Then we obtained transient differential transmission signals by equation shown below:

$$\frac{\Delta T}{T} = \frac{T_{\text{pump-on}} - T_{\text{pump-off}}}{T_{\text{pump-off}}}$$

We processed the analysis of hole transfer kinetics by biexponential fitting based on the following formula:

$$i = A_1 e^{-t/\tau_1} + A_2 e^{-t/\tau_2}$$

### **GIWAXS Measurement**

GIWAXS measurements were performed in a Xeuss 3.0 SAXS/WAXS system with a wavelength of  $\lambda = 1.54189 \text{ \AA}$  at Vacuum Interconnected Nanotech Workstation (Nano-X).

### **Contact Angle**

Contact angle test was conducted on a LAUDA Scientific LSA series video optical contact angle tension measuring instrument.

**AFM Measurement**

The morphologies of blended films were characterized by a VeecoMultiMode atomic force microscopy (AFM) in the tapping mode.

**FT-IR Measurement**

Fourier transform infrared spectroscopy (FT-IR) measurements were conducted on a Nicolet 6700 FTIR-ATR (Thermo Fisher scientific LLC).

**SNOM Measurement**

Scanning near-field optical microscopy (SNOM) images were obtained on nanoIR2-fs (Anasys Instruments) in the contact mode.

## Materials

Compound 1a was synthesized according to the literature method<sup>2,3</sup>. Compound 6 was purchased from Zhengzhou huijuchem Co., Ltd. Compound 8 was purchased from Derthon Optoelectronics Materials Science Technology Co., Ltd. D18 was purchased from Solarmer Materials Inc. PDINN was purchased from Organtec Ltd. PEDOT:PSS (P Al 4083) was purchased from Heraeus Clevios<sup>TM</sup>. Other reagents and solvents were commercially available and used without further purification.

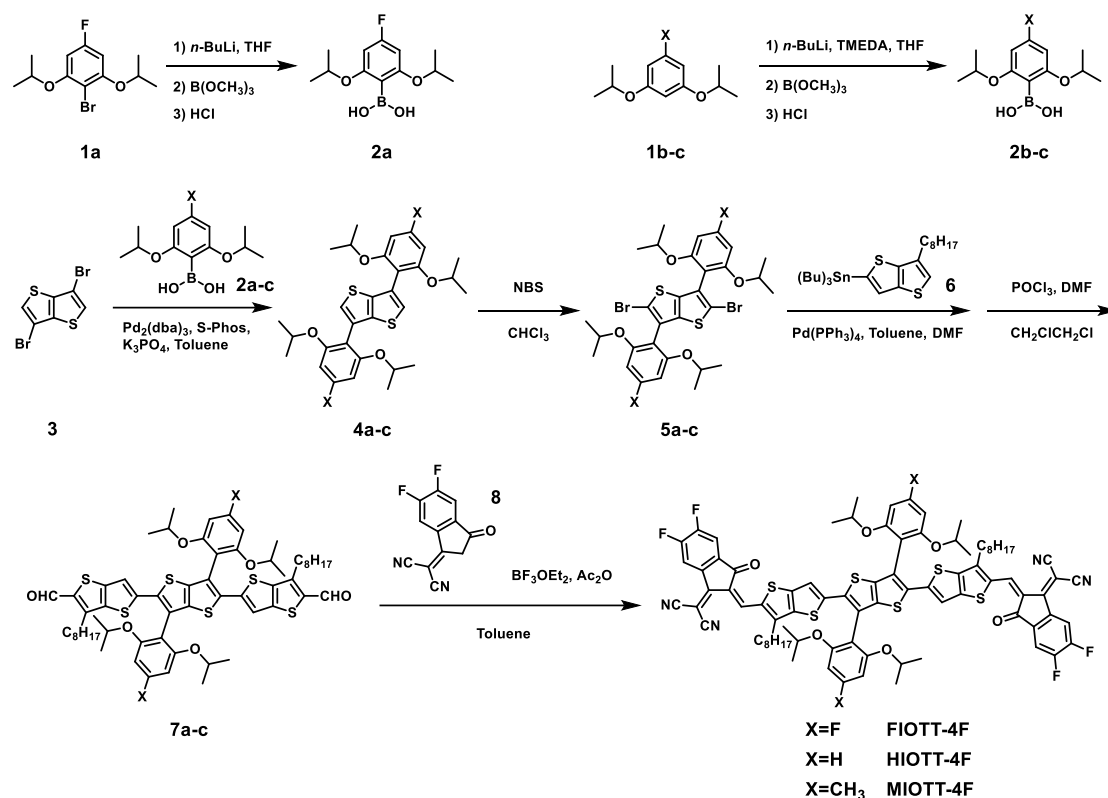

**Scheme S1** Synthetic routes of FIOTT-4F, HIOTT-4F and MIOTT-4F.

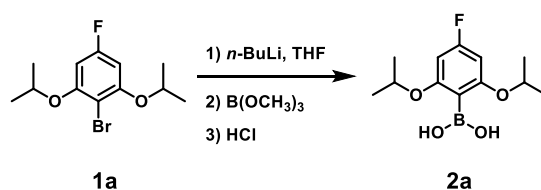

### Compound 2a:

To a solution of Compound 1a (6000 mg, 20.60 mmol) in 80 mL dry THF, *n*-BuLi (11.2 mL, 2.4 M, 26.80 mmol) was added dropwise under the protection of argon at -78 °C. After the mixture was stirred at -78 °C for 1 h, B(OCH<sub>3</sub>)<sub>3</sub> (4282 mg, 41.22 mmol) was added in one portion. Then the mixture was stirred overnight and allowed to warm up to room temperature gradually. After quenched with 100 mL 1 M HCl, the mixture was stirred for 3 h and then extracted with dichloromethane. The combined organic phase was evaporated under vacuum. The obtained product was used directly in the next

reaction without further purification, yielding a colorless solid (4484 mg, 85%).  $^1\text{H}$  NMR (400 MHz, Chloroform-*d*)  $\delta$  7.28 (s, 2H), 6.31 (d,  $J = 10.9$  Hz, 2H), 4.62 (hept,  $J = 6.1$  Hz, 2H), 1.41 (d,  $J = 6.1$  Hz, 12H).

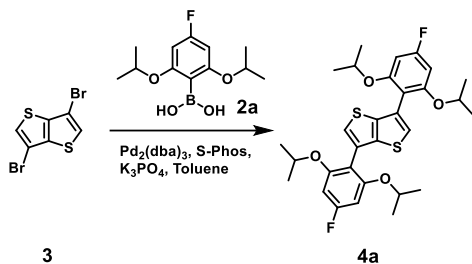

### Compound 4a:

Compound 3 (665 mg, 2.23 mmol), Compound 2a (2280 mg, 8.90 mmol), and potassium phosphate tribasic ( $\text{K}_3\text{PO}_4$ ) (3314 mg, 15.61 mmol) were added in toluene (30 mL). The mixture was frozen by liquid nitrogen, followed by three times of successive vacuum and argon fill cycles. Then,  $\text{Pd}_2(\text{dba})_3$  (119 mg, 0.13 mmol) and 2-dicyclohexylphosphino-2',6'-dimethoxybiphenyl (S-Phos) (107 mg, 0.26 mmol) were added and another three times of successive vacuum and argon fill cycles were performed. The mixture was refluxed at 110  $^\circ\text{C}$  for 48 h. After pouring into the water, the mixture was extracted with dichloromethane. The combined organic phase was evaporated under vacuum. The obtained crude product was purified through column chromatography with the mixture of petroleum ether and dichloromethane (3:2, v/v) to afford Compound 4a as a white solid (1013 mg, 81%).  $^1\text{H}$  NMR (400 MHz, Chloroform-*d*)  $\delta$  7.27 (s, 2H), 6.39 (d,  $J = 10.7$  Hz, 4H), 4.31 (hept,  $J = 6.1$  Hz, 4H), 1.18 (d,  $J = 6.0$  Hz, 24H).

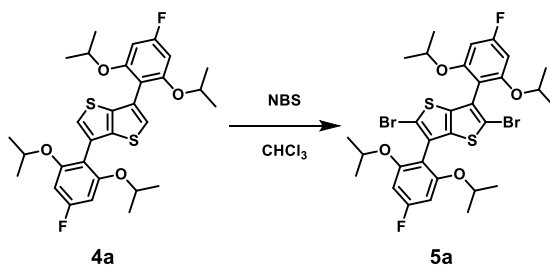

### Compound 5a:

To a solution of compound 4a (935 mg, 1.67 mmol) in 20 mL  $\text{CHCl}_3$ , N-succinbromimide (NBS) (608 mg, 3.42 mmol) was added and stirred dark at 0  $^\circ\text{C}$  for about 10 min (monitored by TLC). After the solvent was evaporated, methanol was added and filtered. The product was dried in vacuum to yield a white solid (1140 mg, 95%).  $^1\text{H}$  NMR (400 MHz, Chloroform-*d*)  $\delta$  6.36 (d,  $J = 10.8$  Hz, 4H), 4.33 (hept,  $J = 5.9$  Hz, 4H), 1.22 – 1.15 (m, 24H).

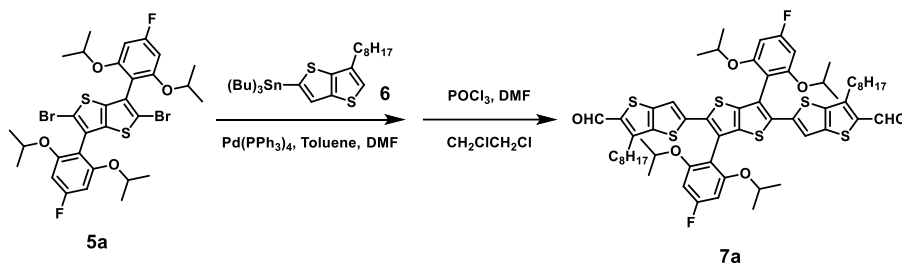

### Compound 7a:

Compound 5a (600 mg, 0.84 mmol) and Compound 6 (1130 mg, 2.09 mmol) were dissolved in toluene (20 mL) and DMF (5 mL). The mixture was frozen by liquid nitrogen, followed by three times of successive vacuum and argon fill cycles. Then, Pd(PPh<sub>3</sub>)<sub>4</sub> (58 mg, 0.05 mmol) was added and another three times of successive vacuum and argon fill cycles were performed. The mixture was refluxed at 120 °C overnight. After cooling to room temperature, the mixture was diluted with petroleum ether and quickly passed through a silica gel column with dichloromethane as the eluent. After the solvent was removed by rotary evaporation, the mixture was dissolved with 1,2-dichloroethane and injected into the Vilsmeier-Haack reagent (freshly prepared by 0.5 mL POCl<sub>3</sub> and 1 mL DMF at 0 °C under argon). The mixture was heated to 70 °C and kept for about 2 h (monitored by TLC). After cooling to room temperature, the mixture was poured slowly into a saturated sodium bicarbonate solution and stirred for another 4 h. The crude product was extracted with dichloromethane and dried over anhydrous Na<sub>2</sub>SO<sub>4</sub>. After removing the solvent, silica gel column chromatography was used to purify the product with the mixture of petroleum ether and dichloromethane (1:1~1:4, v/v) as the eluent, yielding an orange solid (657 mg, 70% in total). <sup>1</sup>H NMR (400 MHz, Chloroform-*d*) δ 10.01 (s, 2H), 7.12 (s, 2H), 6.39 (d, *J* = 10.7 Hz, 4H), 4.43 – 4.25 (m, 4H), 3.06 – 2.94 (m, 4H), 1.77 – 1.65 (m, 4H), 1.34 – 1.21 (m, 20H), 1.16 (d, *J* = 5.6 Hz, 12H), 0.99 (d, *J* = 5.6 Hz, 12H), 0.88 (t, *J* = 6.1 Hz, 6H).

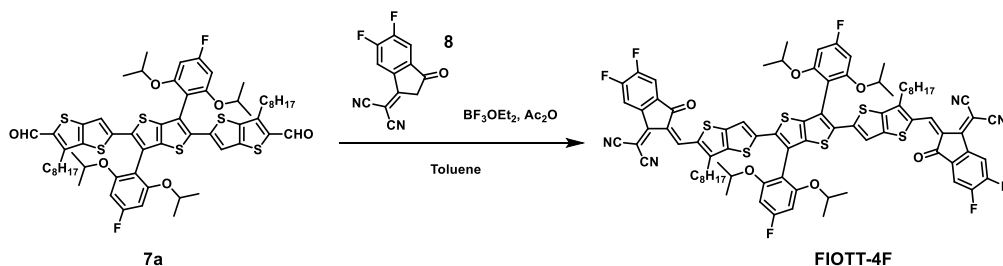

### FIOTT-4F:

FIOTT-4F was prepared by the method from the literature report<sup>4</sup>. Compound 7a (210 mg, 0.19 mmol) and Compound 8 (95 mg, 0.41 mmol) were dissolved in toluene (20 mL). Then, BF<sub>3</sub>OEt<sub>2</sub> (336 mg, 2.35 mmol) and Ac<sub>2</sub>O (0.2 mL) was injected and the mixture was stirring at room temperature for 1 h. Once the reaction was completed, the mixture was poured into methanol and the filtered solid was purified by silica gel column chromatography with the mixture of petroleum ether and dichloromethane (1:2, v/v) as the eluent, yielding a dark brown solid (275 mg, 95%). <sup>1</sup>H NMR (400 MHz, Chloroform-*d*) δ 9.03 (s, 2H), 8.53 (dd, *J* = 10.0, 6.4 Hz, 2H), 7.65 (t, *J* = 7.5 Hz, 2H),



6.42 (d,  $J = 10.7$  Hz, 4H), 4.39 (hept,  $J = 5.9$  Hz, 4H), 3.11 – 2.93 (m, 4H), 1.68 (p,  $J = 7.6$  Hz, 4H), 1.37 – 1.21 (m, 20H), 1.18 (d,  $J = 6.0$  Hz, 12H), 1.02 (d,  $J = 6.0$  Hz, 12H), 0.87 (t,  $J = 6.8$  Hz, 6H). MS (MALDI-TOF):  $m/z$  1540.60

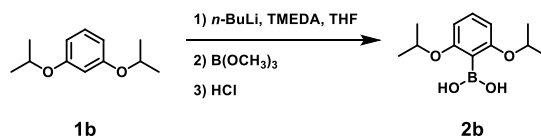

### Compound 2b:

To a solution of Compound 1b (6000 mg, 30.88 mmol) in 40 mL dry Et<sub>2</sub>O, N,N,N',N'-tetramethylethylenediamine (TMEDA) (3.8 mL) and *n*-BuLi (16.8 mL, 2.4 M, 40.32 mmol) was added dropwise under the protection of argon at -5 °C. After the mixture was stirred at -5 °C for 1 h, 40 mL THF was injected. Then, B(OCH<sub>3</sub>)<sub>3</sub> (6418 mg, 61.74 mmol) was injected at -78 °C and the mixture was allowed to warm up to room temperature gradually. After quenched with 100 mL 1 M HCl, the mixture was stirred for 3 h and then extracted with dichloromethane. The combined organic phase was evaporated under vacuum. The obtained product was used directly in the next reaction without further purification, yielding a colorless oil (6985 mg, 95%). <sup>1</sup>H NMR (400 MHz, Chloroform-*d*) δ 7.51 (s, 2H), 7.32 (t,  $J = 8.4$  Hz, 1H), 6.59 (d,  $J = 8.4$  Hz, 2H), 4.69 (hept,  $J = 6.1$  Hz, 2H), 1.40 (d,  $J = 6.1$  Hz, 12H).

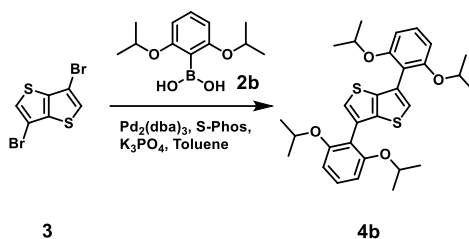

### Compound 4b:

Compound 3 (600 mg, 2.01 mmol), Compound 2b (1917 mg, 8.05 mmol), and potassium phosphate tribasic (K<sub>3</sub>PO<sub>4</sub>) (2987 mg, 14.07 mmol) were added in toluene (30 mL). The mixture was frozen by liquid nitrogen, followed by three times of successive vacuum and argon fill cycles. Then, Pd<sub>2</sub>(dba)<sub>3</sub> (110 mg, 0.12 mmol) and 2-dicyclohexylphosphino-2',6'-dimethoxybiphenyl (S-Phos) (99 mg, 0.24 mmol) were added and another three times of successive vacuum and argon fill cycles were performed. The mixture was refluxed at 110 °C for 48 h. After pouring into the water, the mixture was extracted with dichloromethane. The combined organic phase was evaporated under vacuum. The obtained crude product was purified through column chromatography with the mixture of petroleum ether and dichloromethane (1:1, v/v) to afford Compound 4b as a white solid (886 mg, 84%). <sup>1</sup>H NMR (400 MHz, Chloroform-*d*) δ 7.33 (s, 2H), 7.22 (t,  $J = 8.3$  Hz, 2H), 6.68 (d,  $J = 8.3$  Hz, 4H), 4.28 (hept,  $J = 6.0$  Hz, 4H), 1.15 (d,  $J = 6.1$  Hz, 24H).

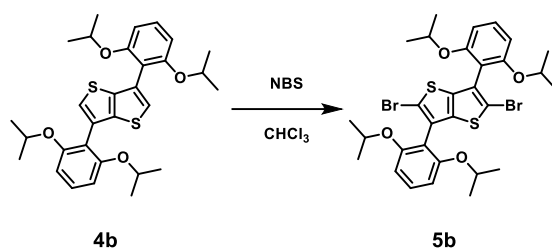

### Compound 5b:

To a solution of compound 4b (600 mg, 1.14 mmol) in 20 mL  $\text{CHCl}_3$ , N-succinbromimide (NBS) (417 mg, 2.34 mmol) was added and stirred dark at 0 °C for about 10 min (monitored by TLC). After the solvent was evaporated, methanol was added and filtered. The product was dried in vacuum to yield a white solid (763 mg, 98%).  $^1\text{H NMR}$  (400 MHz, Chloroform-*d*)  $\delta$  7.29 (t,  $J = 8.3$  Hz, 2H), 6.66 (d,  $J = 8.3$  Hz, 4H), 4.30 (hept,  $J = 6.1$  Hz, 4H), 1.16 (dd,  $J = 7.7, 6.2$  Hz, 24H).

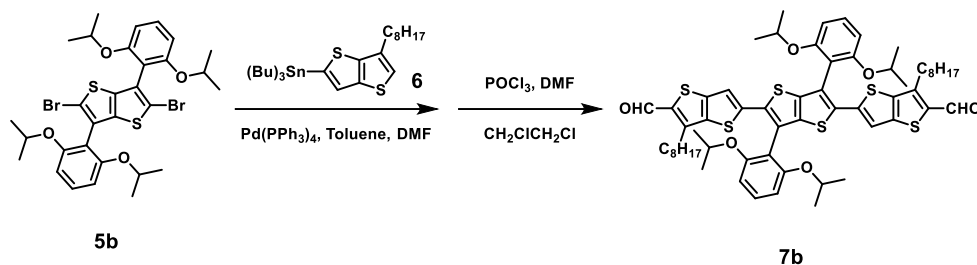

### Compound 7b:

Compound 5b (600 mg, 0.88 mmol) and Compound 6 (1190 mg, 2.20 mmol) were dissolved in toluene (20 mL) and DMF (5 mL). The mixture was frozen by liquid nitrogen, followed by three times of successive vacuum and argon fill cycles. Then,  $\text{Pd}(\text{PPh}_3)_4$  (61 mg, 0.05 mmol) was added and another three times of successive vacuum and argon fill cycles were performed. The mixture was refluxed at 120 °C overnight. After cooling to room temperature, the mixture was diluted with petroleum ether and quickly passed through a silica gel column with dichloromethane as the eluent. After the solvent was removed by rotary evaporation, the mixture was dissolved with 1,2-dichloroethane and injected into the Vilsmeier-Haack reagent (freshly prepared by 0.5 mL  $\text{POCl}_3$  and 1 mL DMF at 0 °C under argon). The mixture was heated to 70 °C and kept for about 2 h (monitored by TLC). After cooling to room temperature, the mixture was poured slowly into a saturated sodium bicarbonate solution and stirred for another 4 h. The crude product was extracted with dichloromethane and dried over anhydrous  $\text{Na}_2\text{SO}_4$ . After removing the solvent, silica gel column chromatography was used to purify the product with the mixture of petroleum ether and dichloromethane (1:1~1:4, v/v) as the eluent, yielding an orange solid (695 mg, 73% in total).  $^1\text{H NMR}$  (400 MHz, Chloroform-*d*)  $\delta$  10.00 (s, 2H), 7.36 (t,  $J = 8.3$  Hz, 2H), 7.09 (s, 2H), 6.67 (d,  $J = 8.4$  Hz, 4H), 4.35 (hept,  $J = 6.0$  Hz, 4H), 2.98 (t,  $J = 7.3$  Hz, 4H), 1.69 (p,  $J = 7.4$  Hz, 4H), 1.30 – 1.22 (m, 20H), 1.14 (d,  $J = 6.0$  Hz, 12H), 0.99 (d,  $J = 6.0$  Hz, 12H), 0.88 (t,  $J = 6.8$  Hz, 6H).

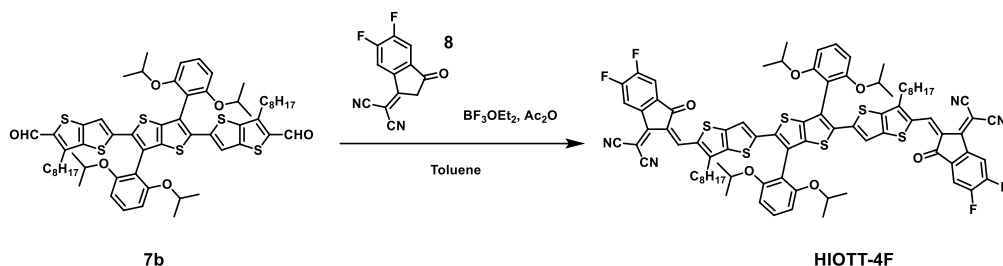

### HIOTT-4F:

HIOTT-4F was prepared by the method from the literature report<sup>4</sup>. Compound 7b (200 mg, 0.18 mmol) and Compound 8 (94 mg, 0.41 mmol) were dissolved in toluene (20 mL). Then,  $\text{BF}_3\text{OEt}_2$  (319 mg, 2.25 mmol) and  $\text{Ac}_2\text{O}$  (0.2 mL) was injected and the mixture was stirring at room temperature for 1 h. Once the reaction was completed, the mixture was poured into methanol and the filtered solid was purified by silica gel column chromatography with the mixture of petroleum ether and dichloromethane (1:2, v/v) as the eluent, yielding a dark brown solid (258 mg, 95%).  $^1\text{H}$  NMR (400 MHz, Chloroform-*d*)  $\delta$  9.01 (s, 2H), 8.53 (dd,  $J = 10.0, 6.5$  Hz, 2H), 7.64 (t,  $J = 7.5$  Hz, 2H), 7.42 (t,  $J = 8.4$  Hz, 2H), 7.14 (s, 2H), 6.70 (d,  $J = 8.4$  Hz, 4H), 4.40 (hept,  $J = 6.1$  Hz, 4H), 3.10 – 2.90 (m, 4H), 1.67 (p,  $J = 8.1, 6.8$  Hz, 4H), 1.35 – 1.22 (m, 20H), 1.16 (d,  $J = 6.0$  Hz, 12H), 1.02 (d,  $J = 6.0$  Hz, 12H), 0.88 (t,  $J = 6.8$  Hz, 6H). MS (MALDI-TOF):  $m/z$  1504.75

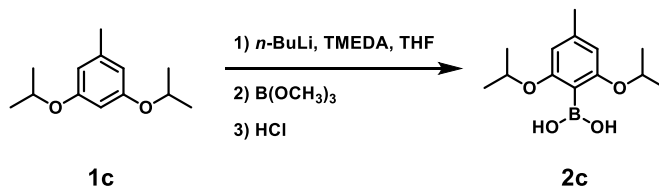

### Compound 2c:

To a solution of Compound 1c (3516 mg, 16.88 mmol) in 20 mL dry  $\text{Et}_2\text{O}$ ,  $\text{N,N,N',N'}$ -tetramethylethylenediamine (TMEDA) (2.1 mL) and  $n\text{-BuLi}$  (9.2 mL, 2.4 M, 21.94 mmol) was added dropwise under the protection of argon at  $-5$  °C. After the mixture was stirred at  $-5$  °C for 1 h, 20 mL THF was injected. Then,  $\text{B}(\text{OCH}_3)_3$  (3508 mg, 33.76 mmol) was injected at  $-78$  °C and the mixture was allowed to warm up to room temperature gradually. After quenched with 100 mL 1 M HCl, the mixture was stirred for 3 h and then extracted with dichloromethane. The combined organic phase was evaporated under vacuum. The obtained product was used directly in the next reaction without further purification, yielding a colorless oil (3830 mg, 90%).  $^1\text{H}$  NMR (400 MHz, Chloroform-*d*)  $\delta$  7.45 (s, 2H), 6.40 (s, 2H), 4.68 (hept,  $J = 6.1$  Hz, 2H), 2.33 (s, 3H), 1.39 (d,  $J = 6.1$  Hz, 12H).

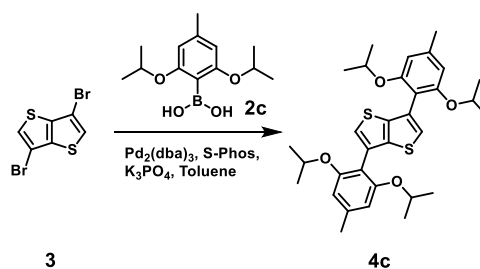

### Compound 4c:

Compound 3 (608 mg, 2.04 mmol), Compound 2c (2058 mg, 8.16 mmol), and potassium phosphate tribasic (K<sub>3</sub>PO<sub>4</sub>) (3031 mg, 14.28 mmol) were added in toluene (30 mL). The mixture was frozen by liquid nitrogen, followed by three times of successive vacuum and argon fill cycles. Then, Pd<sub>2</sub>(dba)<sub>3</sub> (110 mg, 0.12 mmol) and 2-dicyclohexylphosphino-2',6'-dimethoxybiphenyl (S-Phos) (98 mg, 0.24 mmol) were added and another three times of successive vacuum and argon fill cycles were performed. The mixture was refluxed at 110 °C for 48 h. After pouring into the water, the mixture was extracted with dichloromethane. The combined organic phase was evaporated under vacuum. The obtained crude product was purified through column chromatography with the mixture of petroleum ether and dichloromethane (1:1, v/v) to afford Compound 4c as a white solid (925 mg, 82%). <sup>1</sup>H NMR (400 MHz, Chloroform-*d*) δ 7.29 (s, 2H), 6.51 (s, 4H), 4.24 (hept, *J* = 6.0 Hz, 4H), 2.37 (s, 6H), 1.13 (d, *J* = 6.1 Hz, 24H).

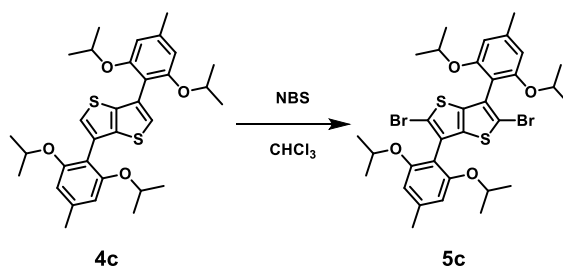

### Compound 5c:

To a solution of compound 4c (800 mg, 1.45 mmol) in 20 mL CHCl<sub>3</sub>, N-succinbromimide (NBS) (528 mg, 2.97 mmol) was added and stirred dark at 0 °C for about 10 min (monitored by TLC). After the solvent was evaporated, methanol was added and filtered. The product was dried in vacuum to yield a white solid (979 mg, 95%). <sup>1</sup>H NMR (400 MHz, Chloroform-*d*) δ 6.48 (s, 4H), 4.26 (hept, *J* = 6.1 Hz, 4H), 2.38 (s, 6H), 1.17 – 1.10 (m, 24H).

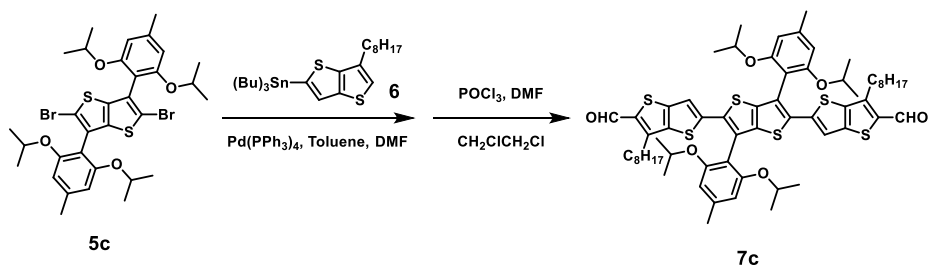

### Compound 7c:

Compound 5c (927 mg, 1.30 mmol) and Compound 6 (1766 mg, 3.26 mmol) were dissolved in toluene (20 mL) and DMF (5 mL). The mixture was frozen by liquid nitrogen, followed by three times of successive vacuum and argon fill cycles. Then, Pd(PPh<sub>3</sub>)<sub>4</sub> (90 mg, 0.08 mmol) was added and another three times of successive vacuum and argon fill cycles were performed. The mixture was refluxed at 120 °C overnight. After cooling to room temperature, the mixture was diluted with petroleum ether and quickly passed through a silica gel column with dichloromethane as the eluent. After the solvent was removed by rotary evaporation, the mixture was dissolved with 1,2-dichloroethane and injected into the Vilsmeier-Haack reagent (freshly prepared by 0.8 mL POCl<sub>3</sub> and 1.5 mL DMF at 0 °C under argon). The mixture was heated to 70 °C and kept for about 2 h (monitored by TLC). After cooling to room temperature, the mixture was poured slowly into a saturated sodium bicarbonate solution and stirred for another 4 h. The crude product was extracted with dichloromethane and dried over anhydrous Na<sub>2</sub>SO<sub>4</sub>. After removing the solvent, silica gel column chromatography was used to purify the product with the mixture of petroleum ether and dichloromethane (1:1~1:4, v/v) as the eluent, yielding an orange solid (980 mg, 68% in total). <sup>1</sup>H NMR (400 MHz, Chloroform-*d*) δ 10.00 (s, 2H), 7.09 (s, 2H), 6.50 (s, 4H), 4.32 (hept, *J* = 6.1 Hz, 4H), 2.99 (t, *J* = 6.7 Hz, 4H), 2.44 (s, 6H), 1.70 (p, *J* = 6.8 Hz, 4H), 1.32 – 1.21 (m, 20H), 1.12 (d, *J* = 6.0 Hz, 12H), 0.98 (d, *J* = 6.0 Hz, 12H), 0.87 (t, *J* = 6.8 Hz, 6H).

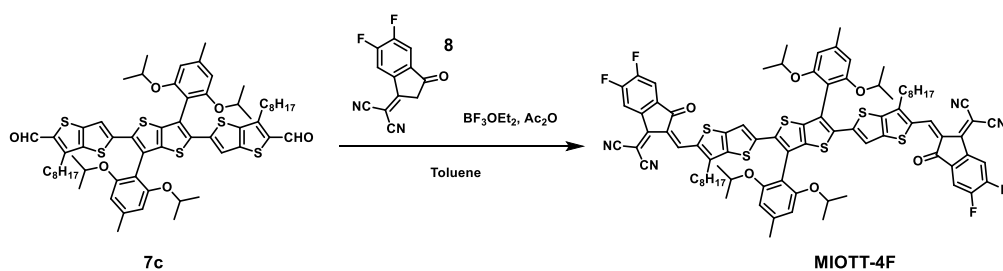

#### MIOTT-4F:

MIOTT-4F was prepared by the method from the literature report<sup>4</sup>. Compound 7c (250 mg, 0.23 mmol) and Compound 8 (114 mg, 0.50 mmol) were dissolved in toluene (20 mL). Then, BF<sub>3</sub>OEt<sub>2</sub> (399 mg, 2.81 mmol) and Ac<sub>2</sub>O (0.3 mL) was injected and the mixture was stirring at room temperature for 1 h. Once the reaction was completed, the mixture was poured into methanol and the filtered solid was purified by silica gel column chromatography with the mixture of petroleum ether and dichloromethane (1:2, v/v) as the eluent, yielding a dark brown solid (335 mg, 95%). <sup>1</sup>H NMR (400 MHz, Chloroform-*d*) δ 9.01 (s, 2H), 8.52 (dd, *J* = 10.0, 6.4 Hz, 2H), 7.63 (t, *J* = 7.5 Hz, 2H), 7.14 (s, 2H), 6.52 (s, 4H), 4.37 (hept, *J* = 6.0 Hz, 4H), 3.02 (t, *J* = 7.6 Hz, 4H), 2.47 (s, 6H), 1.68 (p, *J* = 7.5 Hz, 4H), 1.35 – 1.21 (m, 20H), 1.14 (d, *J* = 6.0 Hz, 12H), 1.00 (d, *J* = 6.0 Hz, 12H), 0.87 (t, *J* = 6.8 Hz, 6H). MS (MALDI-TOF): *m/z* 1532.65

## Supplementary NMR Figures

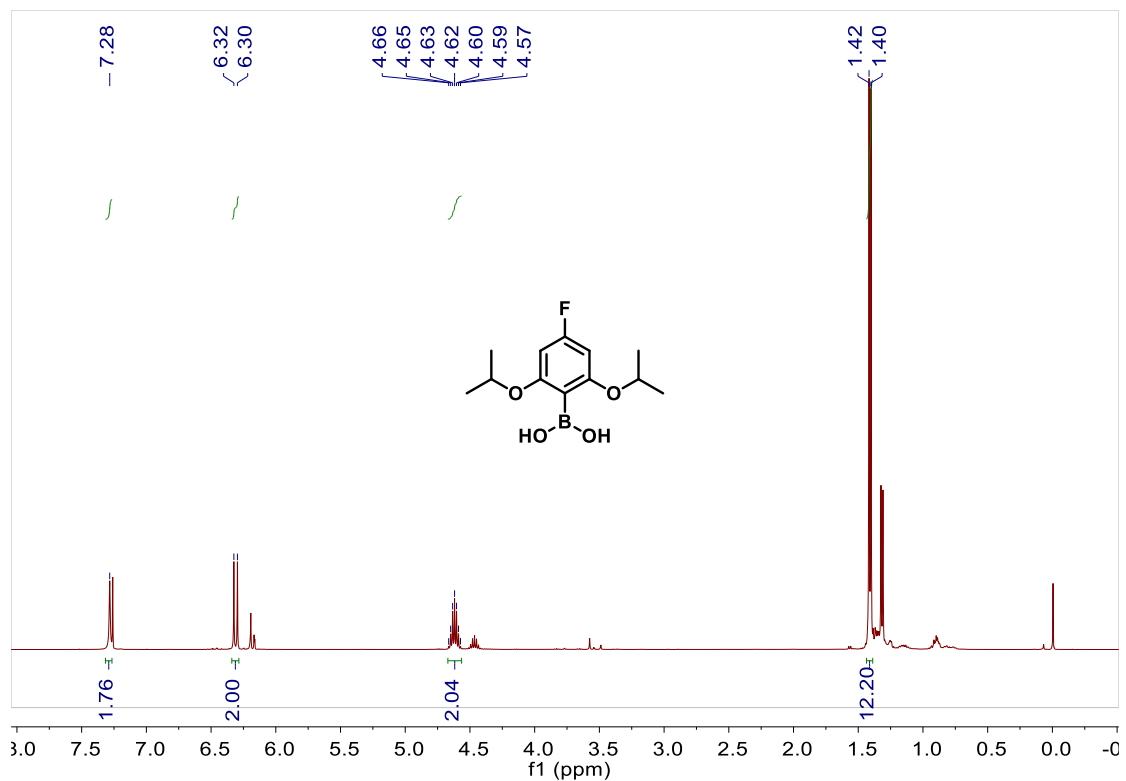

Fig. S1 <sup>1</sup>H-NMR spectrum of compound 2a.

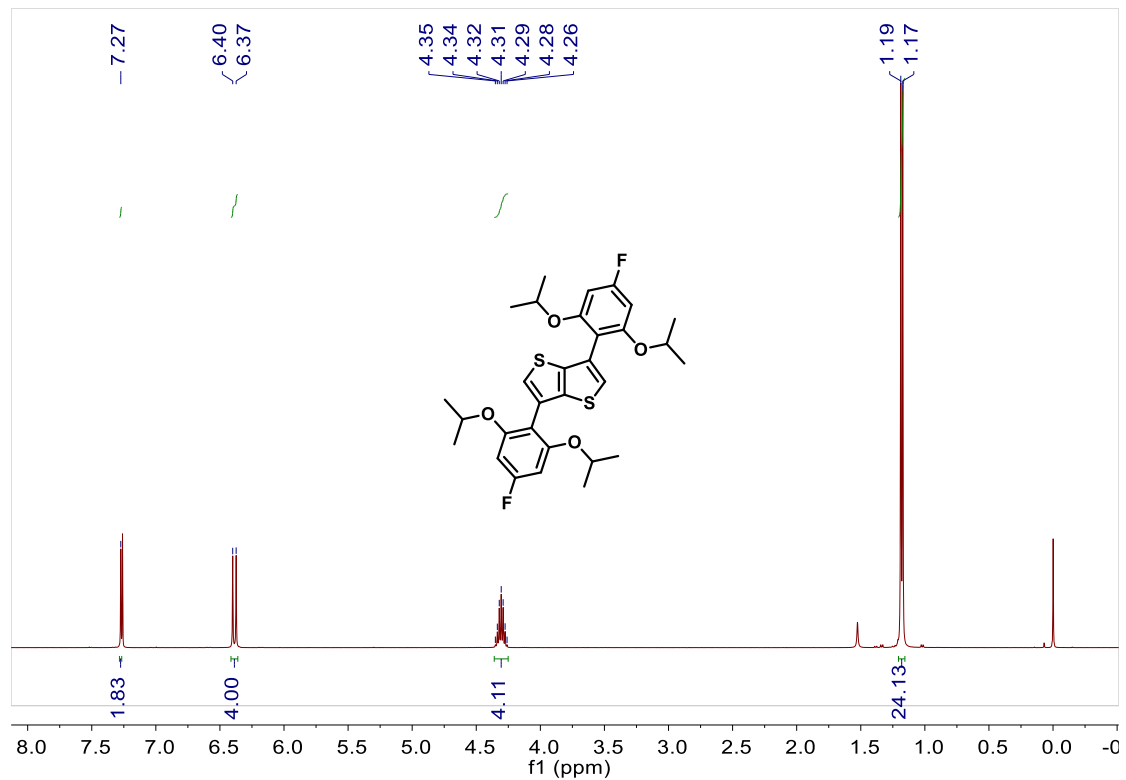

Fig. S2 <sup>1</sup>H-NMR spectrum of compound 4a.

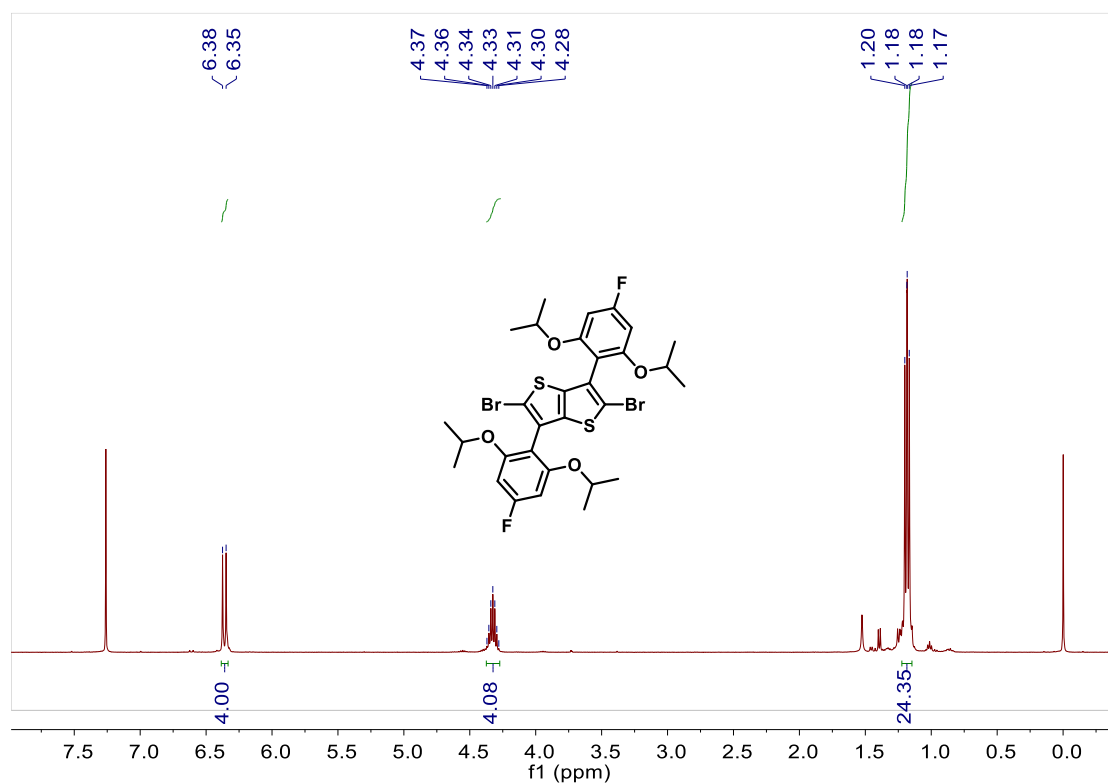

**Fig. S3**  $^1\text{H-NMR}$  spectrum of compound 5a.

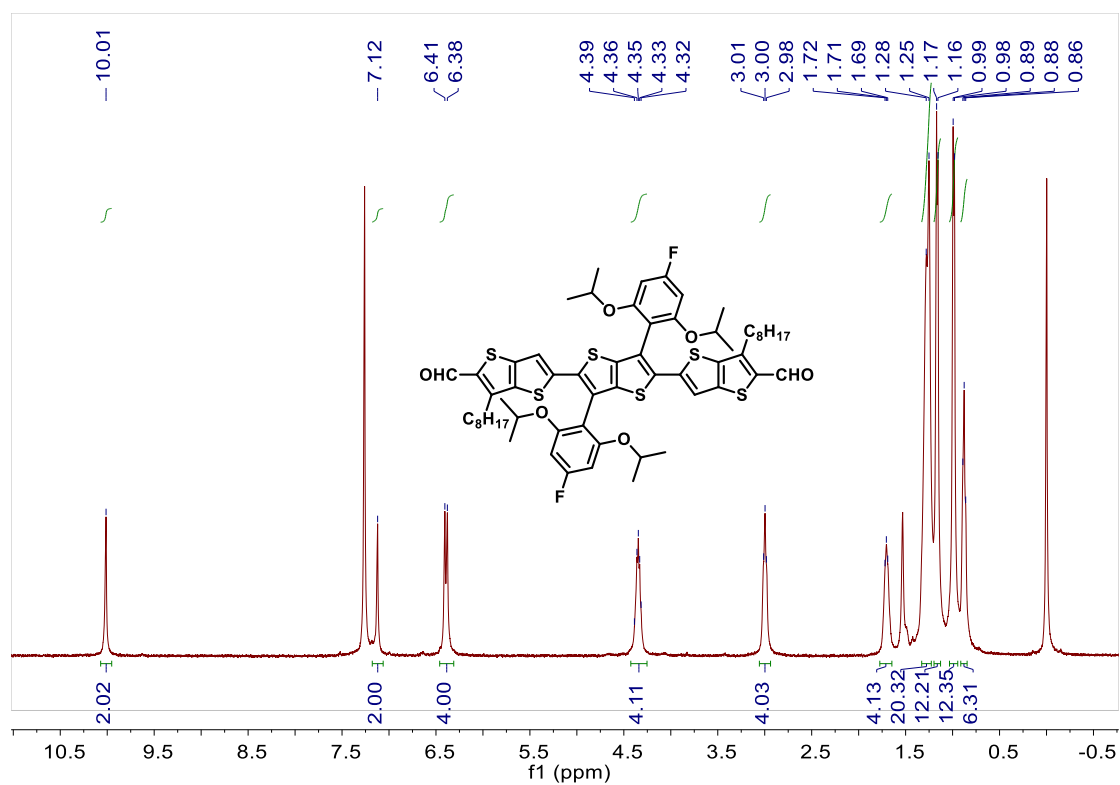

**Fig. S4**  $^1\text{H-NMR}$  spectrum of compound 7a.

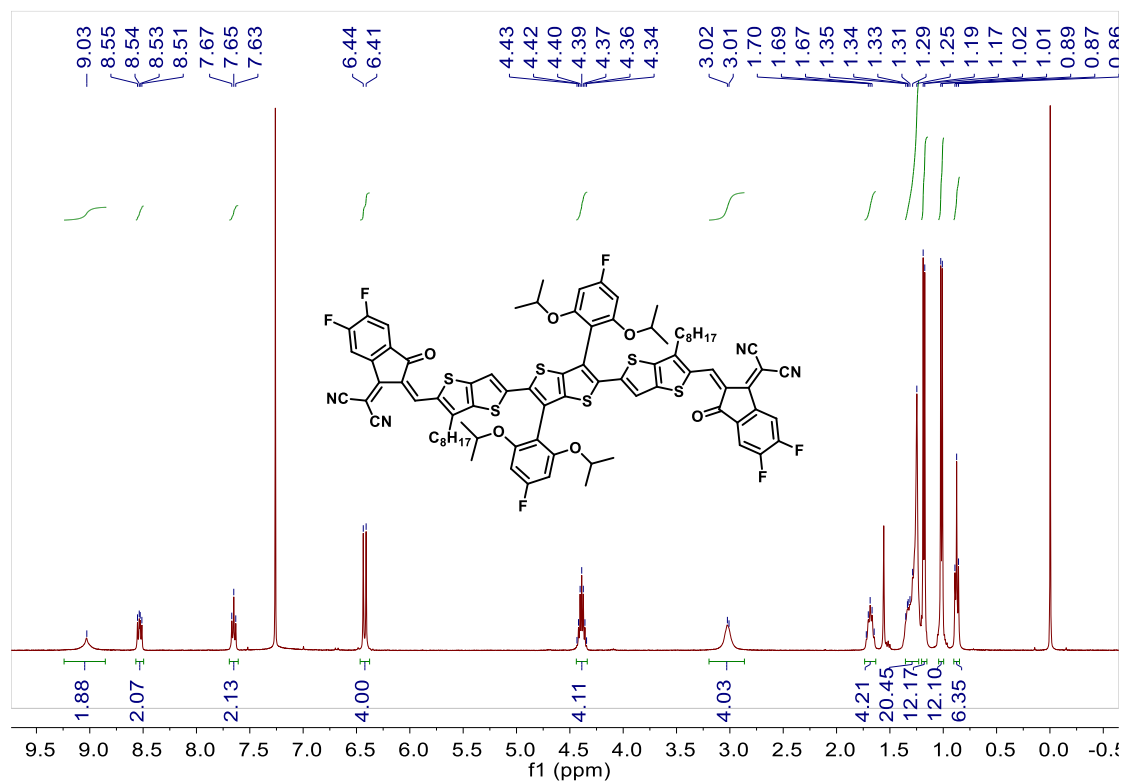

Fig. S5 <sup>1</sup>H-NMR spectrum of FIOTT-4F.

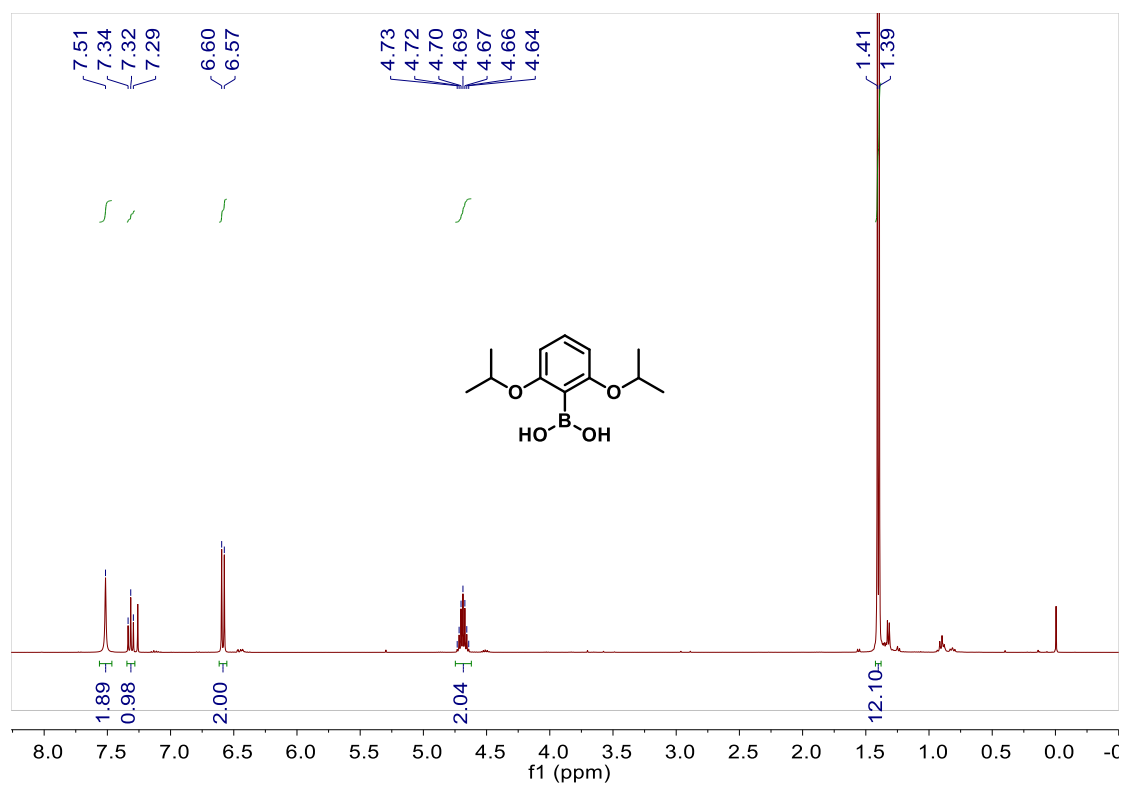

Fig. S6 <sup>1</sup>H-NMR spectrum of compound 2b.



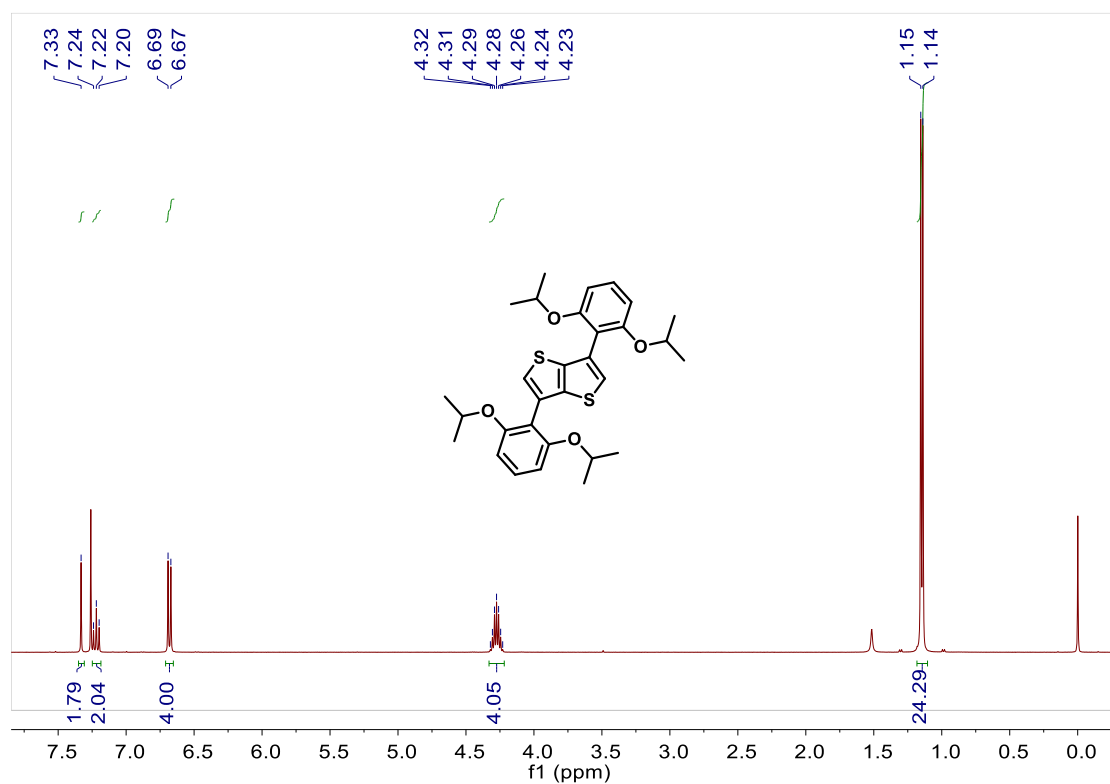

**Fig. S7**  $^1\text{H-NMR}$  spectrum of compound 4b.

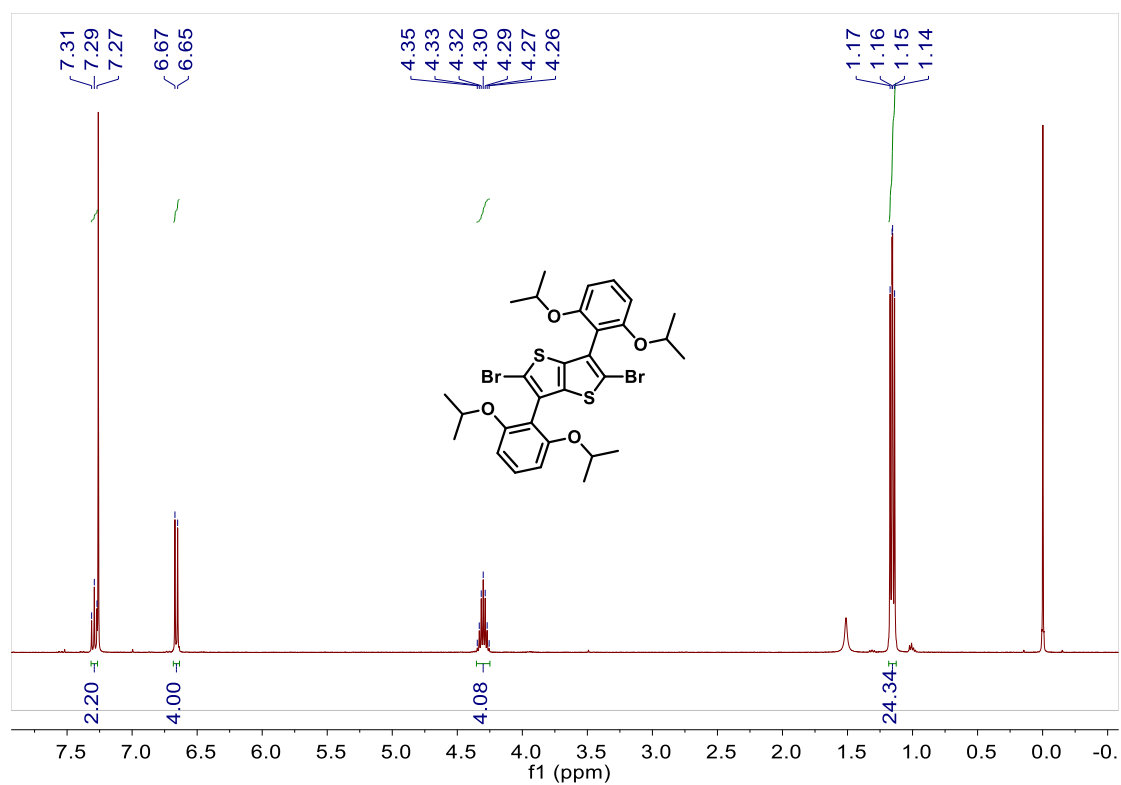

**Fig. S8**  $^1\text{H-NMR}$  spectrum of compound 5b.

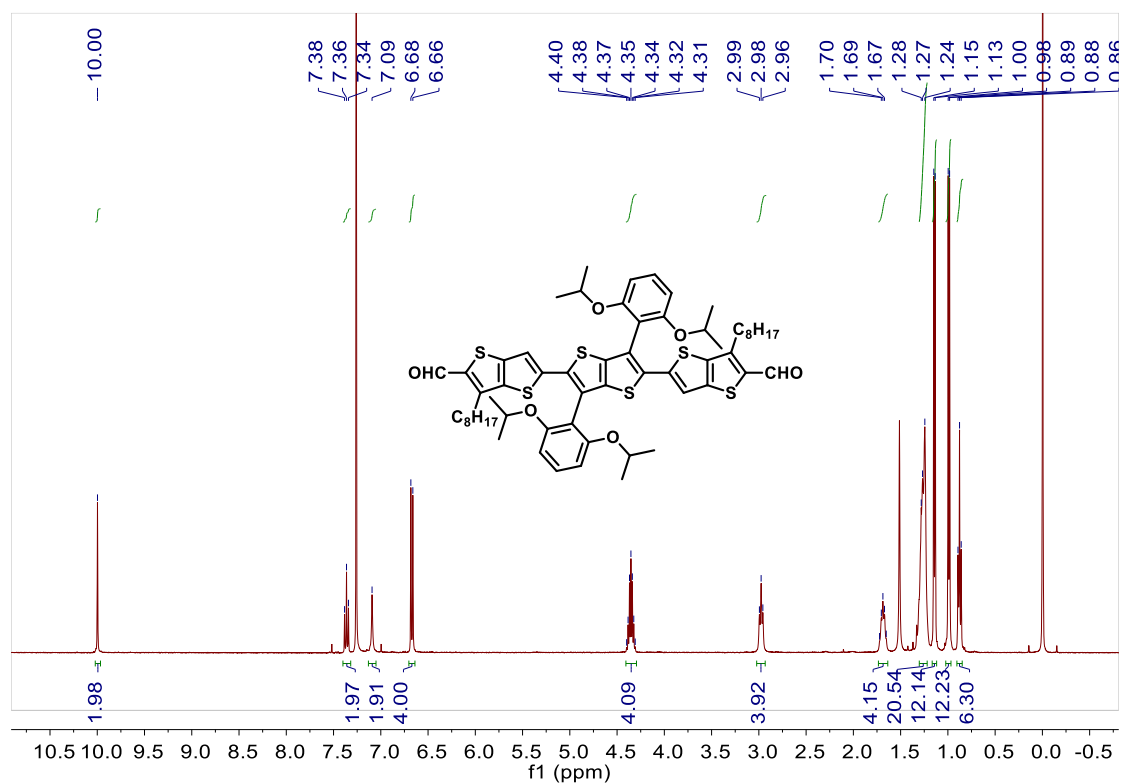

**Fig. S9**  $^1\text{H-NMR}$  spectrum of compound 7b.

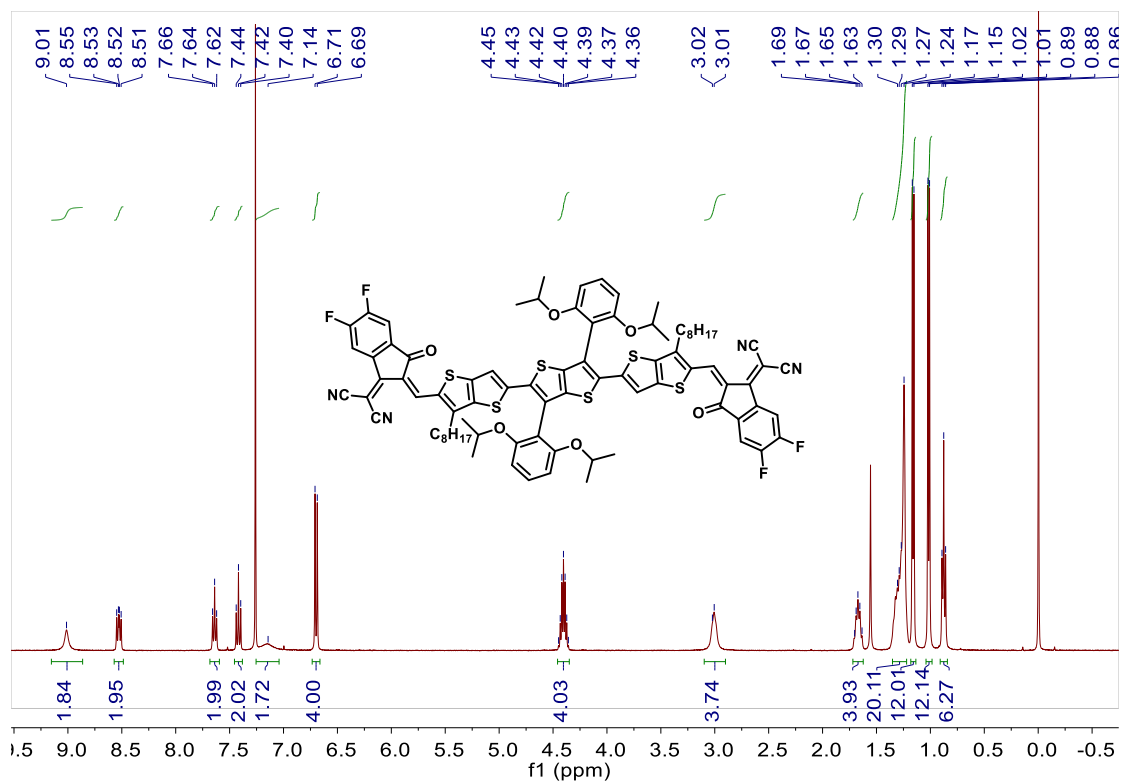

**Fig. S10**  $^1\text{H-NMR}$  spectrum of HIOTT-4F.

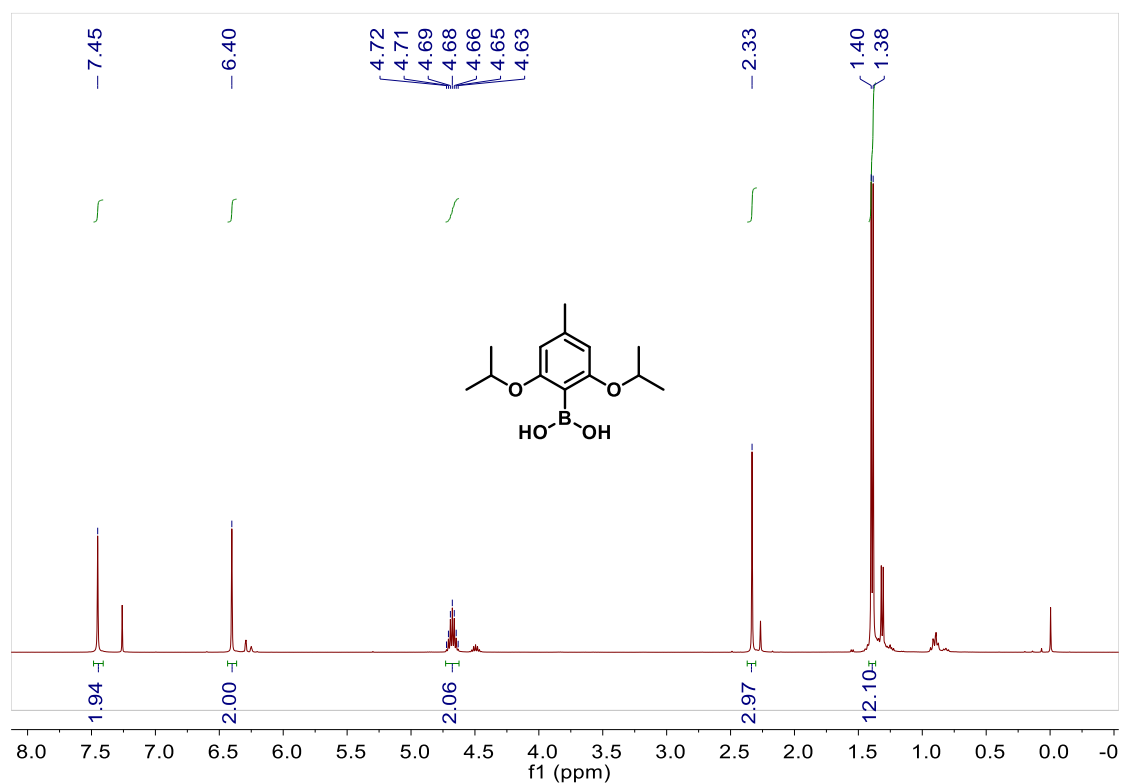

**Fig. S11**  $^1\text{H-NMR}$  spectrum of compound 2c.

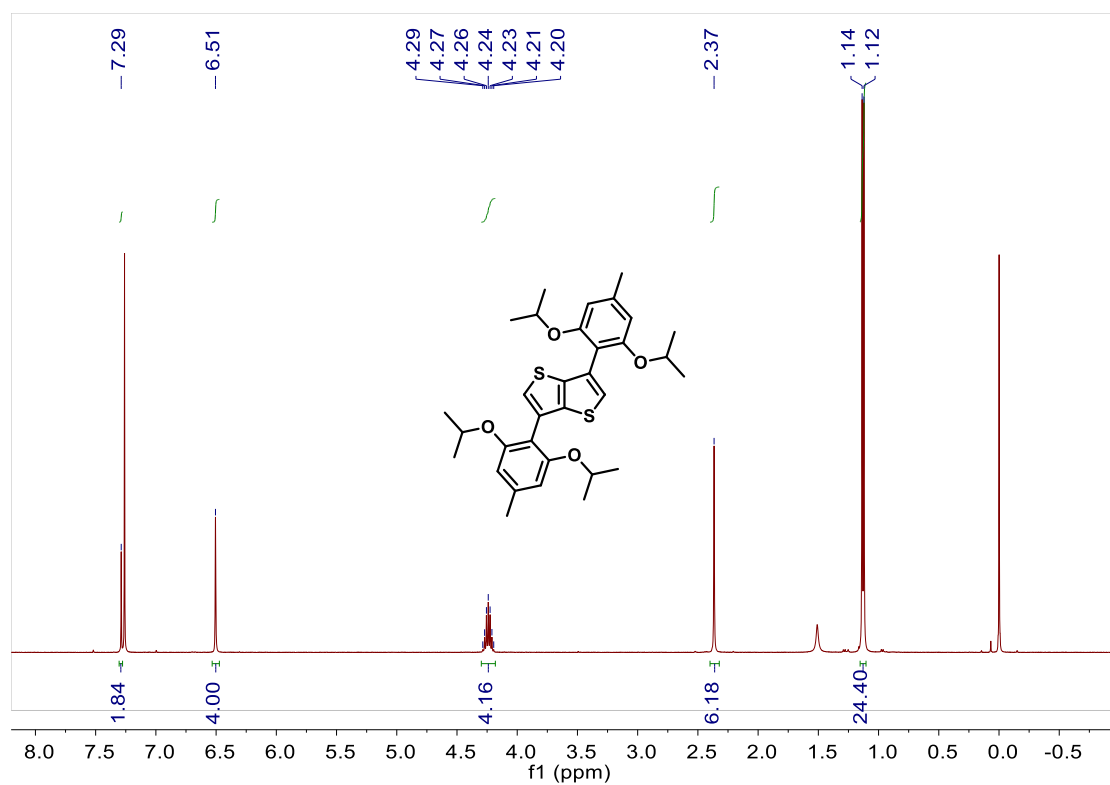

**Fig. S12**  $^1\text{H-NMR}$  spectrum of compound 4c.

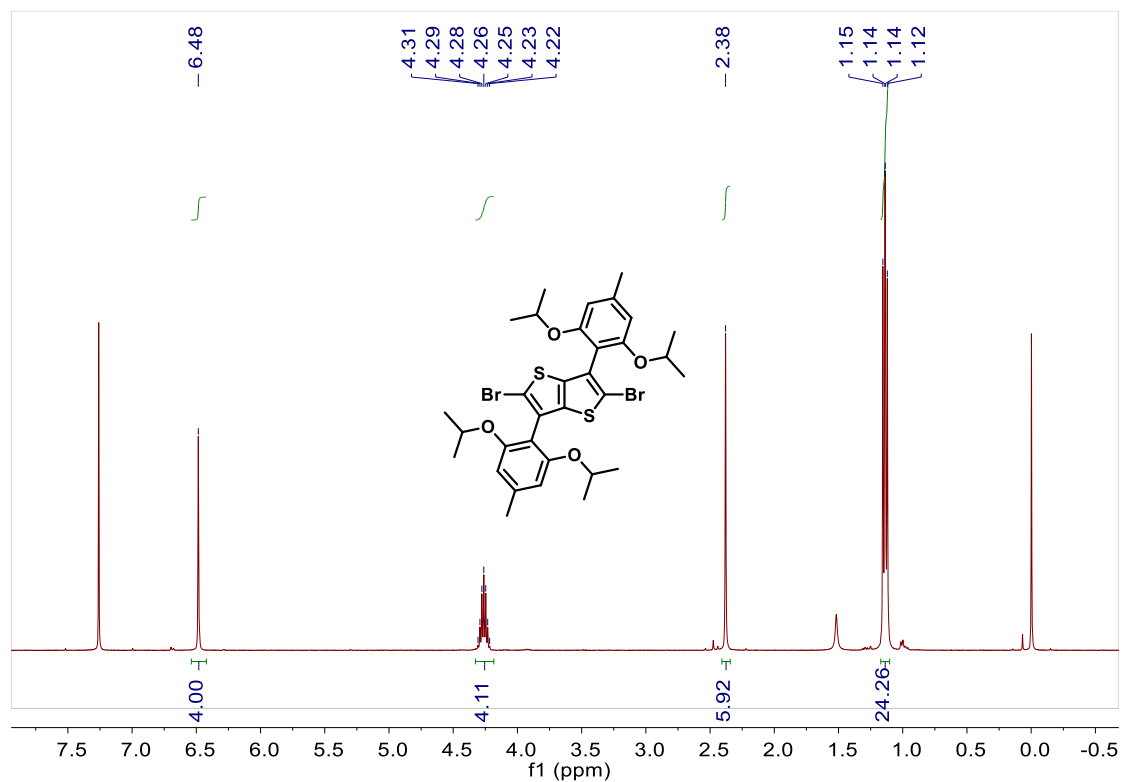

**Fig. S13**  $^1\text{H-NMR}$  spectrum of compound 5c.

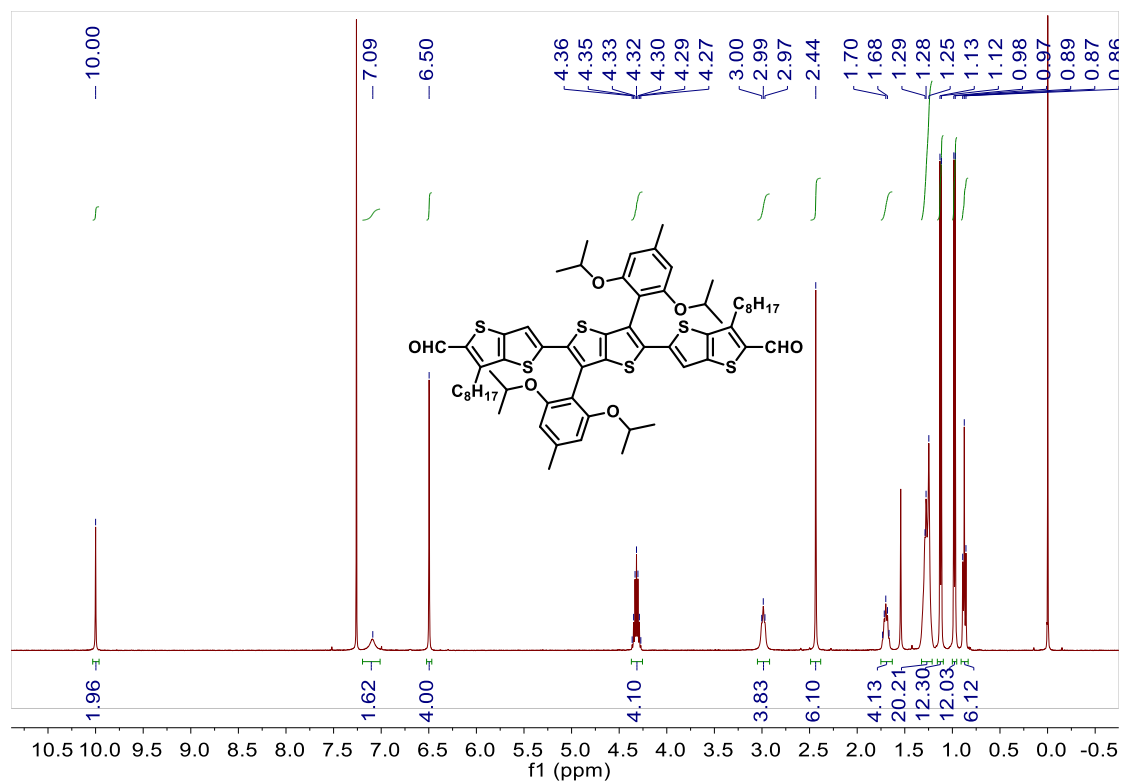

**Fig. S14**  $^1\text{H-NMR}$  spectrum of compound 7c.

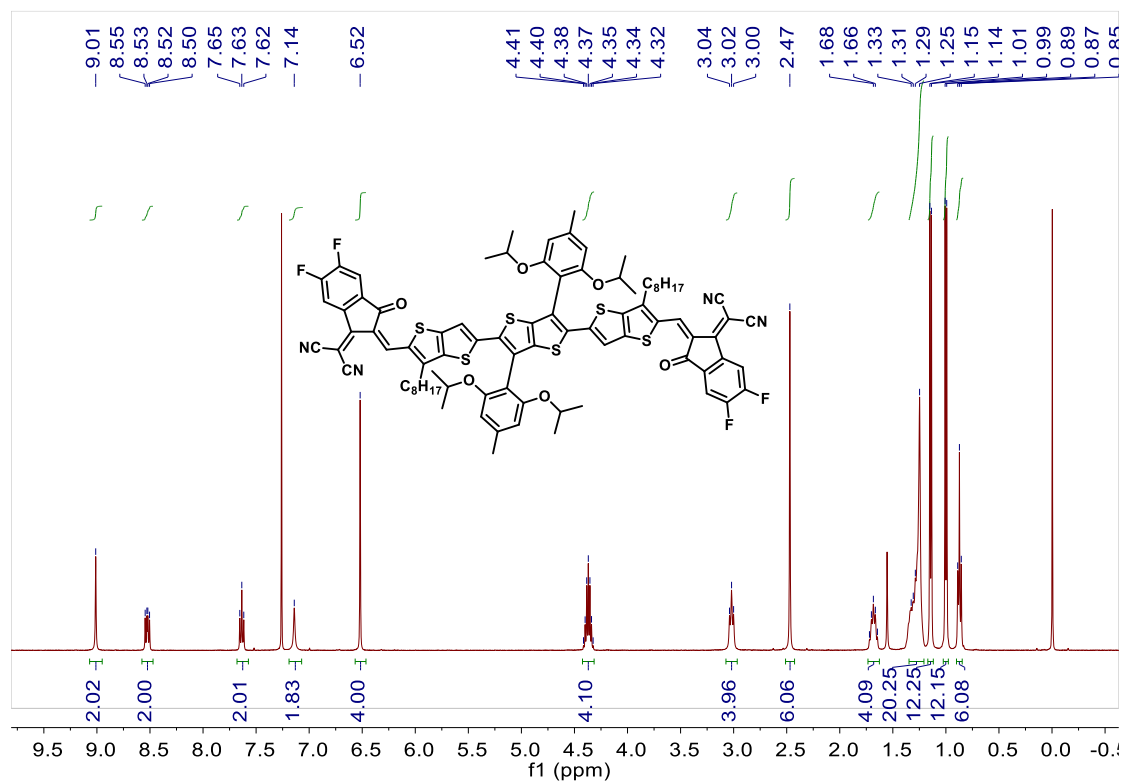

**Fig. S15** <sup>1</sup>H-NMR spectrum of MIOTT-4F.

## Supplementary MALDI-TOF Figures

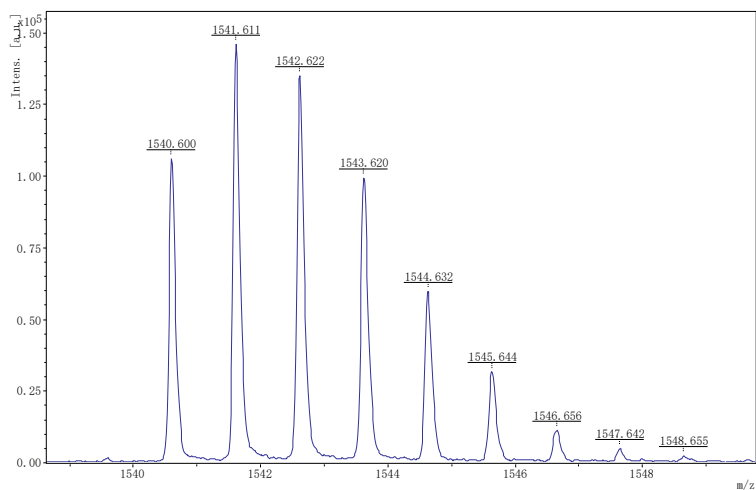

**Fig. S16** MALDI-TOF mass spectrum of FIOTT-4F.

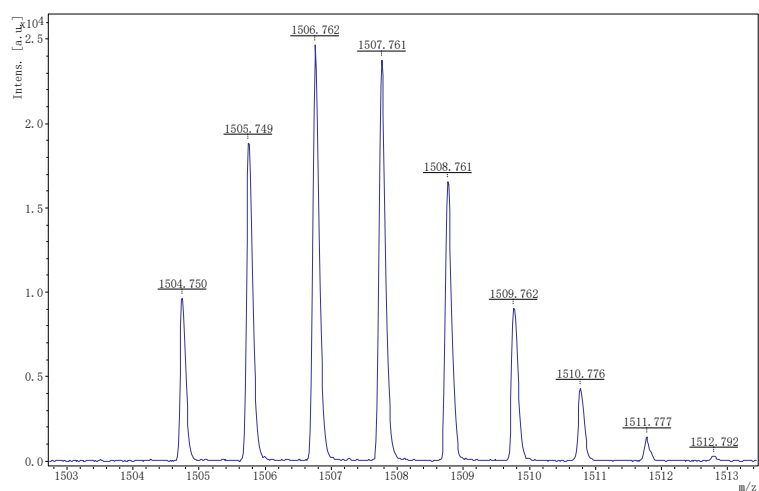

**Fig. S17** MALDI-TOF mass spectrum of HIOTT-4F.

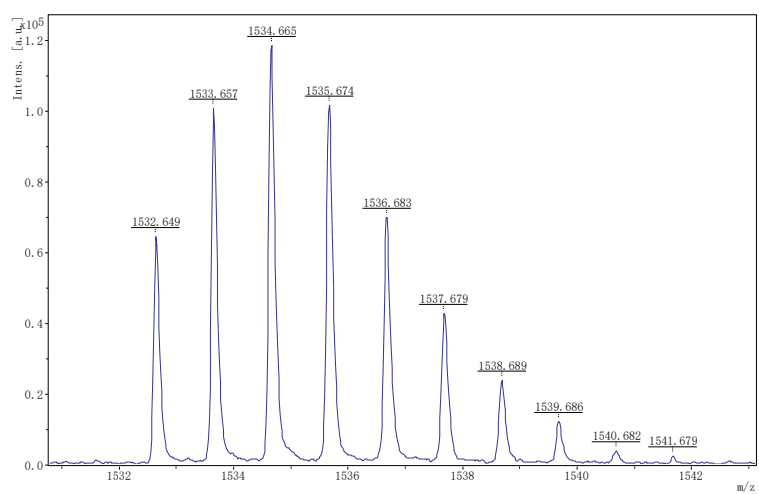

**Fig. S18** MALDI-TOF mass spectrum of MIOTT-4F.

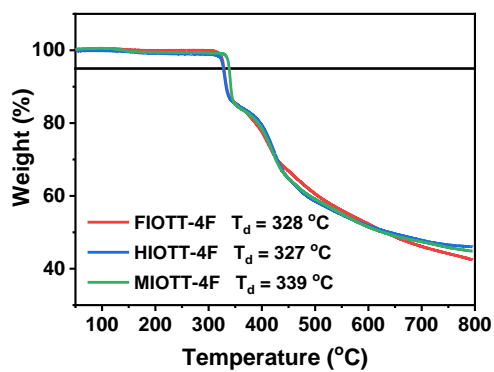

**Fig. S19** TGA curves of the acceptors.

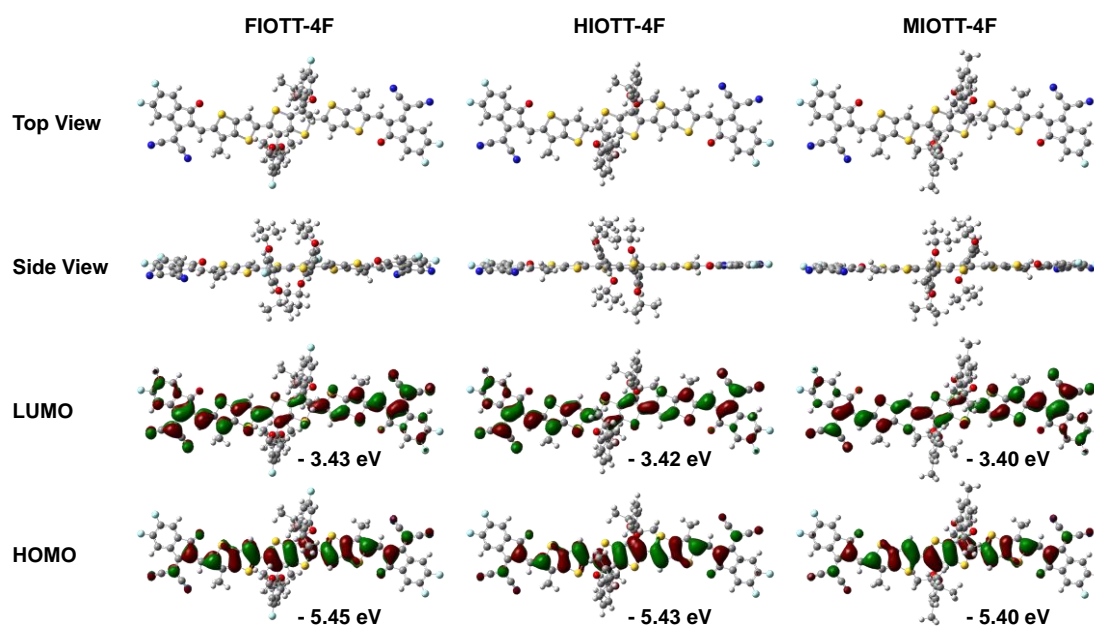

**Fig. S20** Optimized molecular geometries and frontier molecular orbitals of the acceptors with simplified side chains calculated by density functional theory.

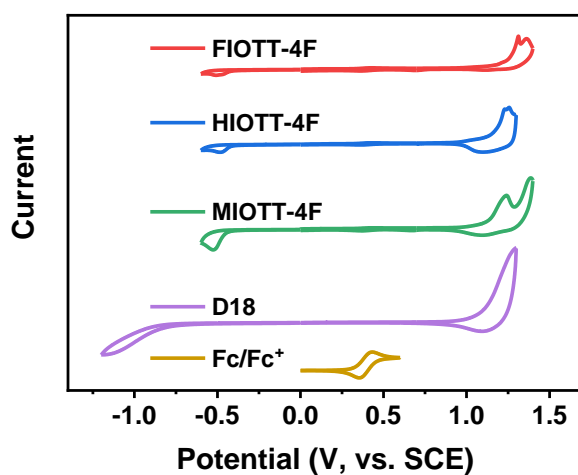

**Fig. S21** Cyclic voltammograms of FIOTT-4F, HIOTT-4F, MIOTT-4F, D18 and Fc/Fc<sup>+</sup> in acetonitrile solutions.

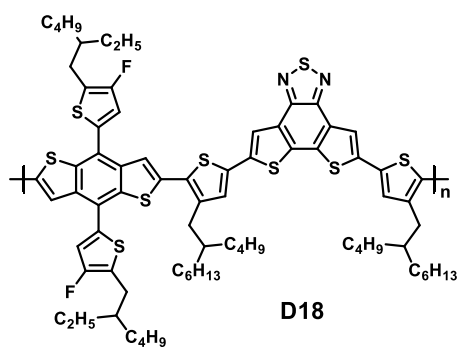

**Fig. S22** Chemical structure of D18.



**Table S1** Crystal data and structure refinement for the three acceptors.

|                                              | FIOTT-4F                                                                                    | HIOTT-4F                                                                                                                                                                                     | MIOTT-4F                                                                                        |
|----------------------------------------------|---------------------------------------------------------------------------------------------|----------------------------------------------------------------------------------------------------------------------------------------------------------------------------------------------|-------------------------------------------------------------------------------------------------|
| CCDC Deposition Number                       | 2353971                                                                                     | 2353972                                                                                                                                                                                      | 2353973                                                                                         |
| Chemical formula (moiety)                    | C <sub>84</sub> H <sub>74</sub> F <sub>6</sub> N <sub>4</sub> O <sub>6</sub> S <sub>6</sub> | C <sub>84</sub> H <sub>75</sub> F <sub>4</sub> N <sub>4</sub> O <sub>6</sub> S <sub>6</sub> ,<br>C <sub>42</sub> H <sub>38</sub> F <sub>2</sub> N <sub>2</sub> O <sub>3</sub> S <sub>3</sub> | 2(C <sub>43</sub> H <sub>40</sub> F <sub>2</sub> N <sub>2</sub> O <sub>3</sub> S <sub>3</sub> ) |
| Chemical formula (sum)                       | C <sub>84</sub> H <sub>74</sub> F <sub>6</sub> N <sub>4</sub> O <sub>6</sub> S <sub>6</sub> | C <sub>126</sub> H <sub>113</sub> F <sub>6</sub> N <sub>6</sub> O <sub>9</sub> S <sub>9</sub>                                                                                                | C <sub>86</sub> H <sub>80</sub> F <sub>4</sub> N <sub>4</sub> O <sub>6</sub> S <sub>6</sub>     |
| Chemical formula weight                      | 1541.83                                                                                     | 2257.76                                                                                                                                                                                      | 1533.90                                                                                         |
| Temperature [K]                              | 170(2)                                                                                      | 170(2)                                                                                                                                                                                       | 170(2)                                                                                          |
| Crystal system                               | Monoclinic                                                                                  | Triclinic                                                                                                                                                                                    | Triclinic                                                                                       |
| Space group                                  | P 1 21/c 1                                                                                  | P -1                                                                                                                                                                                         | P -1                                                                                            |
| a [Å]                                        | 20.4033(9)                                                                                  | 15.5739(12)                                                                                                                                                                                  | 15.606(3)                                                                                       |
| b [Å]                                        | 7.8689(3)                                                                                   | 18.8499(15)                                                                                                                                                                                  | 16.678(3)                                                                                       |
| c [Å]                                        | 25.4607(12)                                                                                 | 20.1648(13)                                                                                                                                                                                  | 18.394(3)                                                                                       |
| α [°]                                        | 90                                                                                          | 98.961(5)                                                                                                                                                                                    | 63.176(11)                                                                                      |
| β [°]                                        | 91.450(2)                                                                                   | 96.362(4)                                                                                                                                                                                    | 69.390(14)                                                                                      |
| γ [°]                                        | 90                                                                                          | 98.914(5)                                                                                                                                                                                    | 69.980(15)                                                                                      |
| Volume [Å <sup>3</sup> ]                     | 4086.4(3)                                                                                   | 5721.3(7)                                                                                                                                                                                    | 3901.2(13)                                                                                      |
| Z                                            | 2                                                                                           | 2                                                                                                                                                                                            | 2                                                                                               |
| ρ <sub>calc</sub> [g cm <sup>-3</sup> ]      | 1.253                                                                                       | 1.311                                                                                                                                                                                        | 1.306                                                                                           |
| Absorpt coefficient [mm <sup>-1</sup> ]      | 2.101                                                                                       | 2.199                                                                                                                                                                                        | 2.159                                                                                           |
| F(000)                                       | 1608                                                                                        | 2362                                                                                                                                                                                         | 1608                                                                                            |
| θ range [°]                                  | 2.166 to 66.596                                                                             | 2.240 to 66.594                                                                                                                                                                              | 2.770 to 54.235                                                                                 |
| Reflections collected                        | 34671                                                                                       | 63824                                                                                                                                                                                        | 18373                                                                                           |
| Independent reflections                      | 7187                                                                                        | 20079                                                                                                                                                                                        | 8683                                                                                            |
| Data/restraints/parameters                   | 7187/98/538                                                                                 | 20079/234/1408                                                                                                                                                                               | 8683/414/931                                                                                    |
| Goodness-of-fit on F <sup>2</sup>            | 1.050                                                                                       | 1.204                                                                                                                                                                                        | 1.060                                                                                           |
| R1, wR2 [I ≥ 2σ (I)]                         | 0.0821, 0.2414                                                                              | 0.1847, 0.4266                                                                                                                                                                               | 0.1800, 0.4130                                                                                  |
| R1, wR2 [all data]                           | 0.0877, 0.2464                                                                              | 0.2413, 0.4694                                                                                                                                                                               | 0.2701, 0.4989                                                                                  |
| Largest diff. peak/hole [e Å <sup>-3</sup> ] | 1.481/-0.426                                                                                | 1.157/-0.839                                                                                                                                                                                 | 0.494/-0.393                                                                                    |

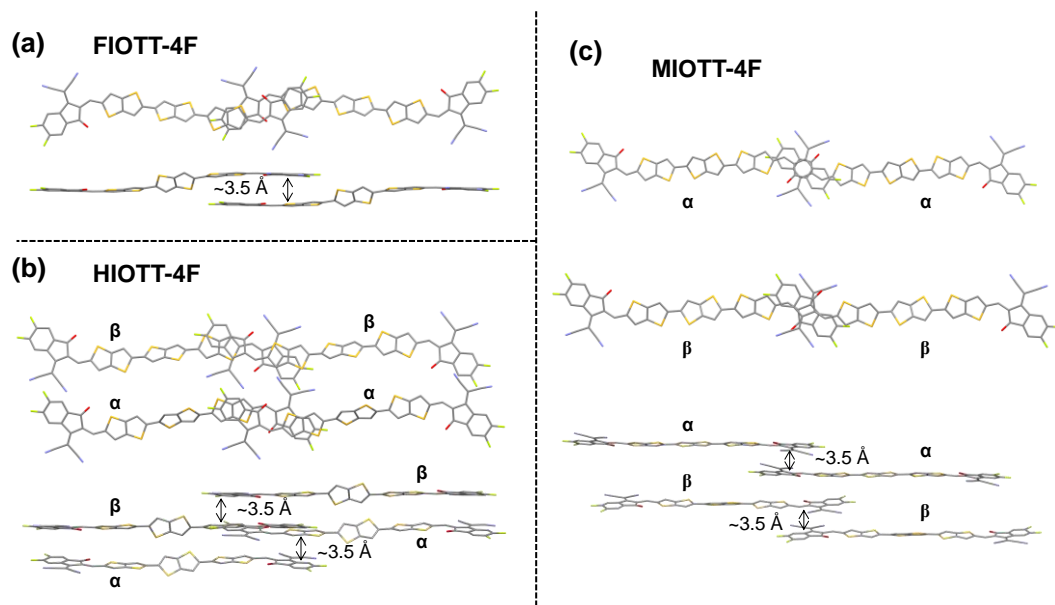

**Fig. S23** The  $\pi$ - $\pi$  stacking distances in a) FIOTT-4F, b) HIOTT-4F, and c) MIOTT-4F single crystals.

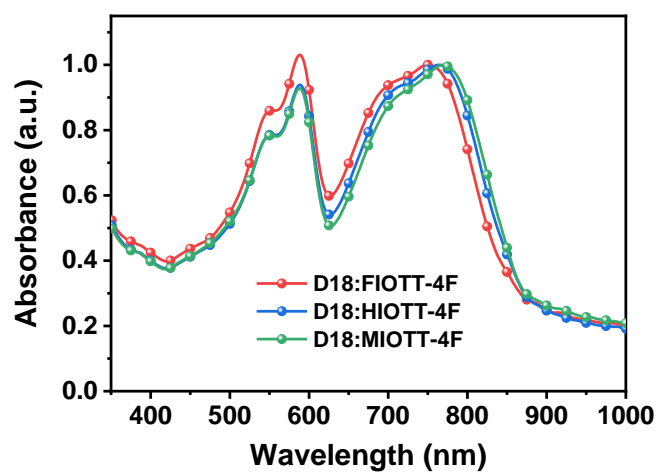

**Fig. S24** UV-vis absorption spectra of D18:FIOTT-4F, D18:HIOTT-4F and D18:MIOTT-4F blend films.

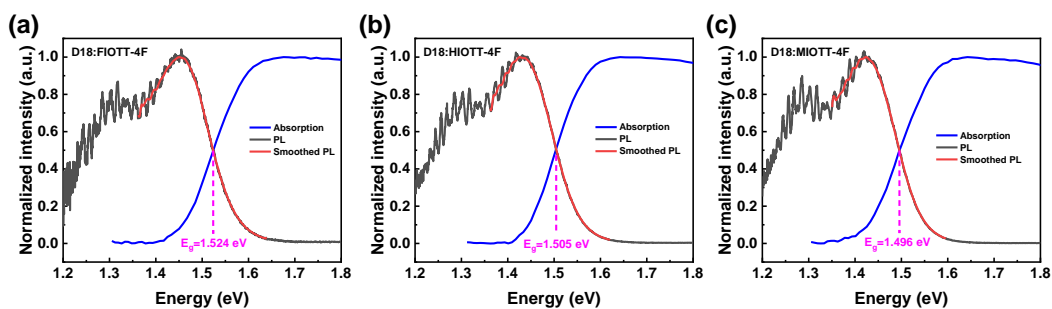

**Fig. S25**  $E_g$  of different devices, calculated by absorption and PL spectra.

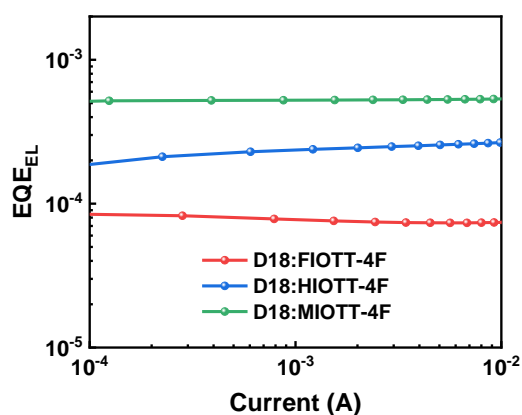

**Fig. S26**  $EQE_{EL}$  characterization of different devices.

**Table S2** Detailed energy losses of different devices.

| Active layer | $E_g$<br>(eV) | $V_{OC,SQ}$<br>(V) | $\Delta E_1$<br>(eV) | $V_{OC,rad}$<br>(V) | $\Delta E_r$<br>(eV) | $V_{OC}$<br>(V) | $EQE_{EL}$            | $\Delta E_{nr}$<br>(eV) | $\Delta E_{loss}$<br>(eV) |
|--------------|---------------|--------------------|----------------------|---------------------|----------------------|-----------------|-----------------------|-------------------------|---------------------------|
| D18:FIOTT-4F | 1.524         | 1.254              | 0.270                | 1.167               | 0.087                | 0.923           | $7.75 \times 10^{-5}$ | 0.244                   | 0.601                     |
| D18:HIOTT-4F | 1.505         | 1.236              | 0.269                | 1.148               | 0.088                | 0.933           | $2.36 \times 10^{-4}$ | 0.215                   | 0.572                     |
| D18:MIOTT-4F | 1.496         | 1.228              | 0.268                | 1.151               | 0.077                | 0.956           | $5.24 \times 10^{-4}$ | 0.195                   | 0.540                     |

Notes:  $\Delta E_1$  comes from the radiative recombination from the absorption above the bandgap, calculated by SQ theory.  $\Delta E_r$  comes from the radiative recombination from the absorption below the bandgap.  $\Delta E_{nr}$  is nonradiative recombination loss, which can be calculated by the following equation:

$$\Delta E_{nr} = -kT \ln(EQE_{EL})$$

where  $EQE_{EL}$  is electroluminescence (EL) quantum efficiency of OSCs,  $k$  is the Boltzmann constant, and  $T$  is the Kelvin temperature<sup>5,6</sup>.

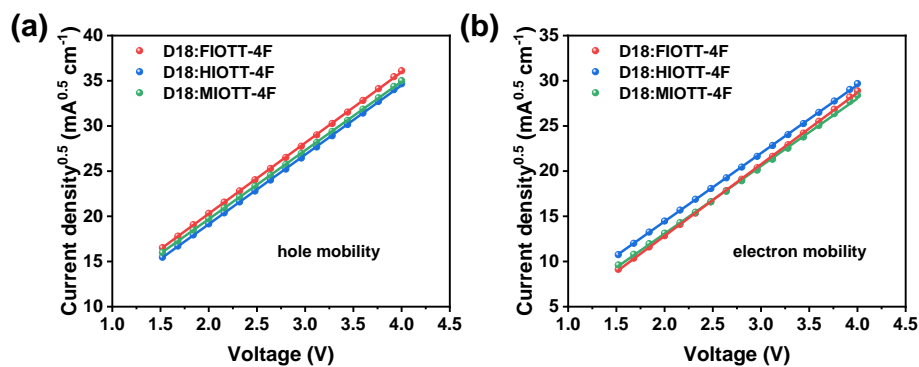

**Fig. S27**  $J^{0.5}$ - $V$  curves of a) electron-only devices and b) hole-only devices.

**Table S3** Hole and electron mobilities of different devices.

| Active layer | $\mu_h \times 10^{-4}$<br>( $\text{cm}^2 \text{V}^{-1} \text{s}^{-1}$ ) | $\mu_e \times 10^{-4}$<br>( $\text{cm}^2 \text{V}^{-1} \text{s}^{-1}$ ) | $\mu_h/\mu_e$ |
|--------------|-------------------------------------------------------------------------|-------------------------------------------------------------------------|---------------|
| D18:FIOTT-4F | $2.17 \pm 0.41$                                                         | $2.13 \pm 0.45$                                                         | 1.02          |
| D18:HIOTT-4F | $1.88 \pm 0.29$                                                         | $1.98 \pm 0.37$                                                         | 0.95          |
| D18:MIOTT-4F | $1.92 \pm 0.37$                                                         | $1.81 \pm 0.19$                                                         | 1.06          |

**Table S4** Summary of prefactors and lifetimes from biexponential fitting of the PB signals.

| Active layer | $A_1$ | $\tau_1$<br>(ps) | $A_2$ | $\tau_2$<br>(ps) |
|--------------|-------|------------------|-------|------------------|
| D18:FIOTT-4F | 0.673 | $0.20 \pm 0.01$  | 0.327 | $5.49 \pm 0.49$  |
| D18:HIOTT-4F | 0.791 | $0.22 \pm 0.01$  | 0.209 | $6.92 \pm 1.12$  |
| D18:MIOTT-4F | 0.744 | $0.38 \pm 0.02$  | 0.256 | $7.10 \pm 1.50$  |

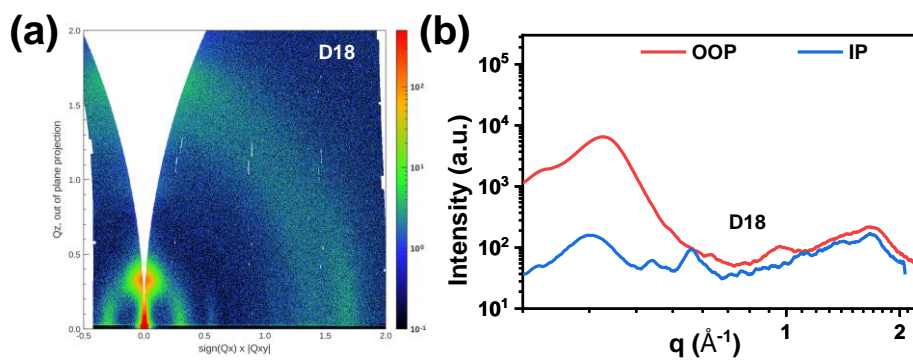

**Fig. S28** a) 2D GIWAXS images and b) 1D intensity profiles of D18 film in out-of-plane (OOP) and in-plane (IP) directions.

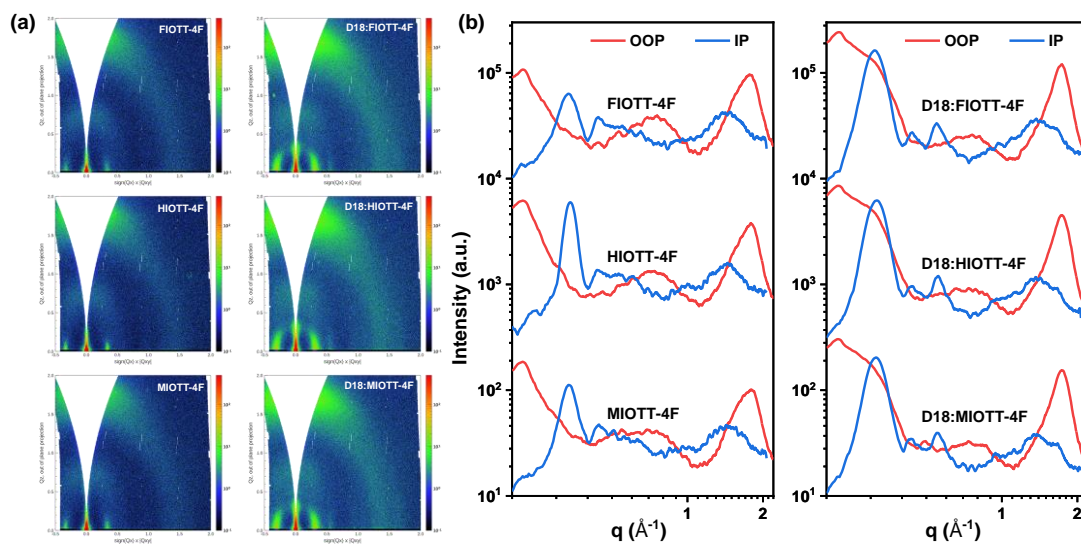

**Fig. 29** a) 2D GIWAXS images and b) 1D intensity profiles of FIOTT-4F, HIOTT-4F, and MIOTT-4F pure films and D18:FIOTT-4F, D18:HIOTT-4F, and D18:MIOTT-4F blend films.

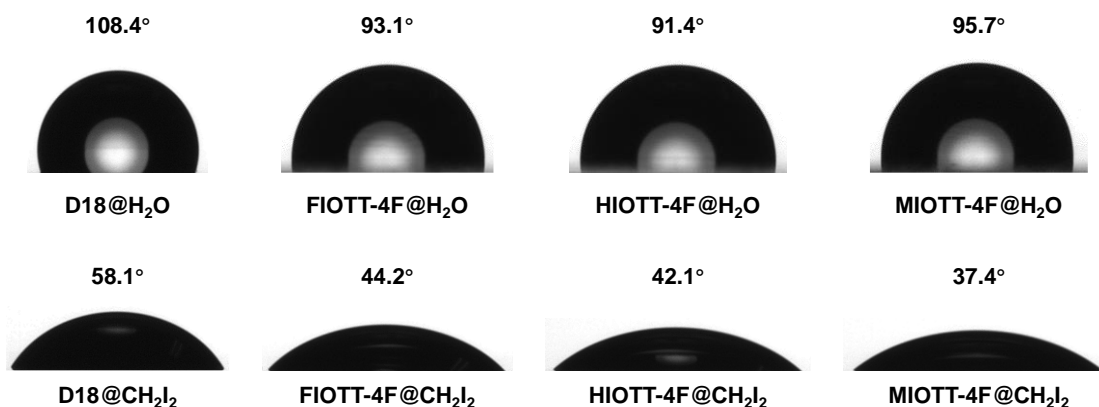

**Fig. S30** Contact angle images of various films with water and diiodomethane (DIM).

**Table S5** The contact angle of different films with water and diiodomethane (DIM), and the calculated surface energy.

| Surface  | $\theta_{\text{Water}}$<br>(°) | $\theta_{\text{DIM}}$<br>(°) | $\gamma^p$ <sup>a</sup><br>(mN m <sup>-1</sup> ) | $\gamma^d$ <sup>b</sup><br>(mN m <sup>-1</sup> ) | $\gamma$ <sup>c</sup><br>(mN m <sup>-1</sup> ) | $\chi^{D-A}$ <sup>d</sup> |
|----------|--------------------------------|------------------------------|--------------------------------------------------|--------------------------------------------------|------------------------------------------------|---------------------------|
| D18      | 108.4                          | 58.1                         | 0.03                                             | 31.52                                            | 31.55                                          | /                         |
| FIOTT-4F | 93.1                           | 44.2                         | 0.72                                             | 36.93                                            | 37.65                                          | 0.27 K                    |
| HIOTT-4F | 91.4                           | 42.1                         | 0.91                                             | 37.77                                            | 38.68                                          | 0.36 K                    |
| MIOTT-4F | 95.7                           | 37.4                         | 0.13                                             | 41.80                                            | 41.93                                          | 0.74 K                    |

<sup>a</sup> Surface tension from polarity component. <sup>b</sup> Surface tension from dispersion component. <sup>c</sup> The total surface tension is calculated through the equation of  $\gamma = \gamma^p + \gamma^d$ .

<sup>d</sup> The Flory-Huggins interaction parameter between the donor (D) and acceptor (A) is calculated with the equation of  $\chi^{D-A} = K(\sqrt{\gamma_D} - \sqrt{\gamma_A})^2$ .

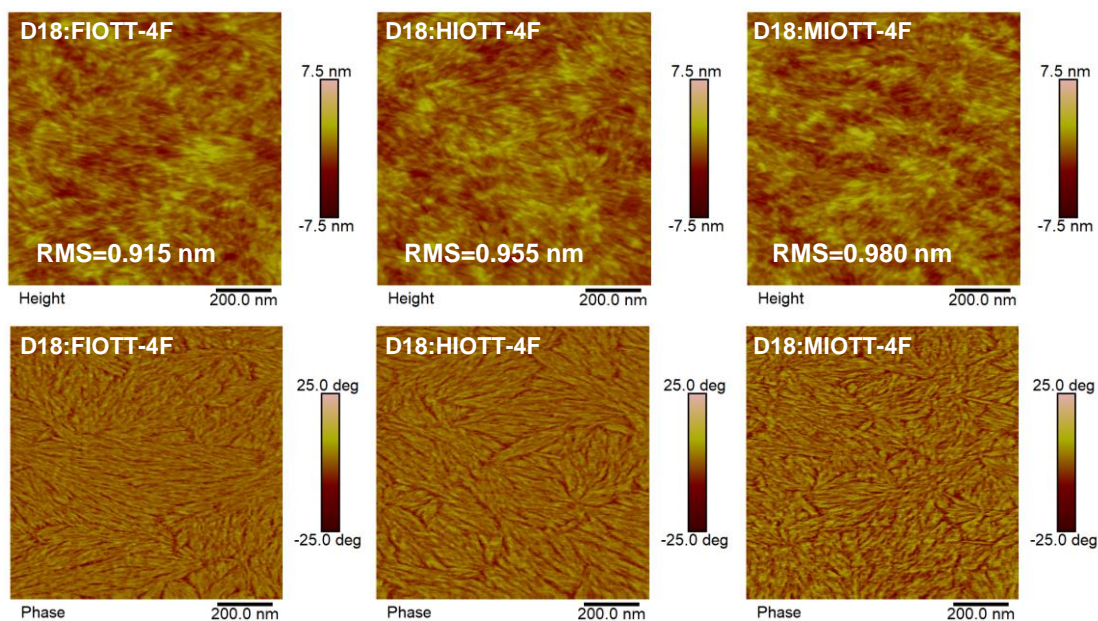

**Fig. S31** AFM height and phase images for different films.

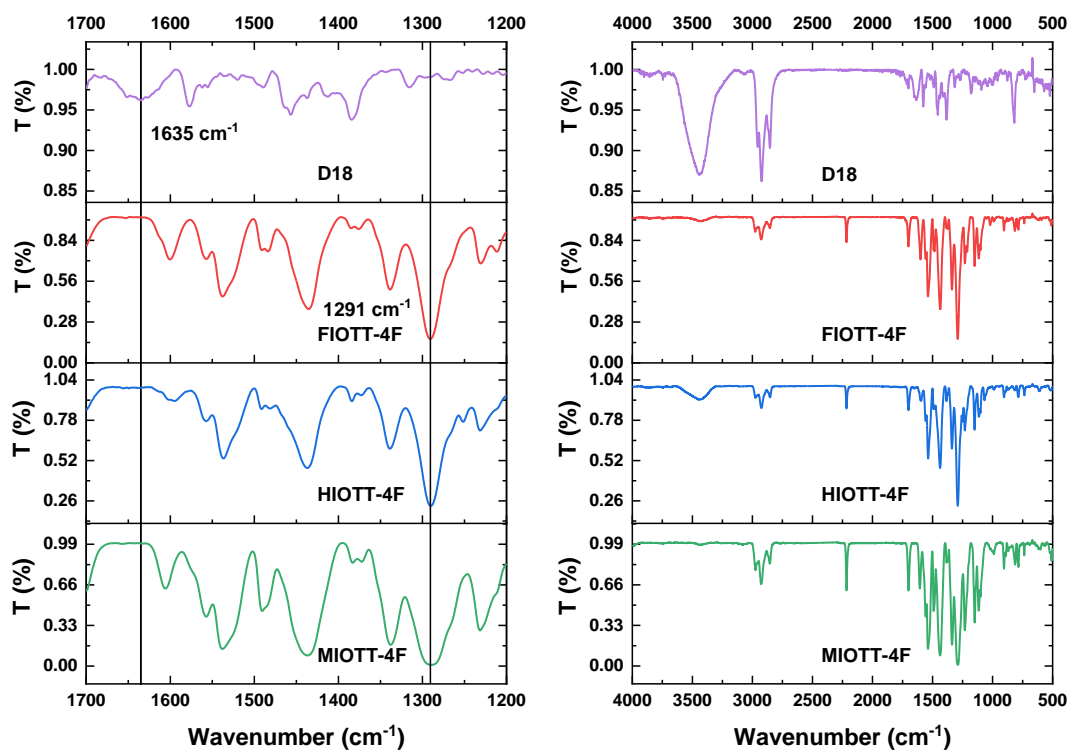

**Fig. S32** FT-IR spectra of D18, FIOTT-4F, HIOTT-4F, and MIOTT-4F.

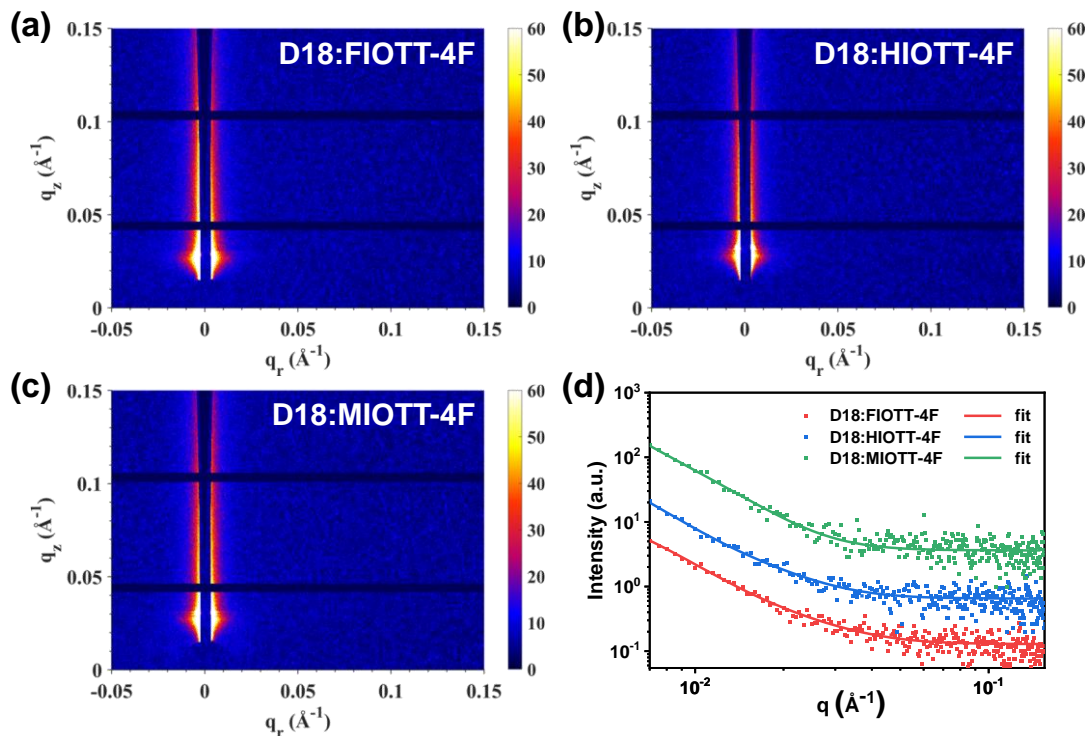

**Fig. S33** a-c) 2D GISAXS images and d) 1D in-plane intensity profiles and fitting curves of D18:FIOTT-4F, D18:HIOTT-4F and D18:MIOTT-4F blend films.

**Table S6** Fitted data of various films obtained from GISAXS measurement.

| Blend        | $2R_g^a$ (nm) | $X_{\text{dab}}^b$ (nm) |
|--------------|---------------|-------------------------|
| D18:FIOTT-4F | 17.4          | 17.7                    |
| D18:HIOTT-4F | 23.8          | 24.2                    |
| D18:MIOTT-4F | 42.6          | 31.9                    |

<sup>a</sup> The sizes of pure acceptor domain. <sup>b</sup> The sizes of amorphous intermixed domain.



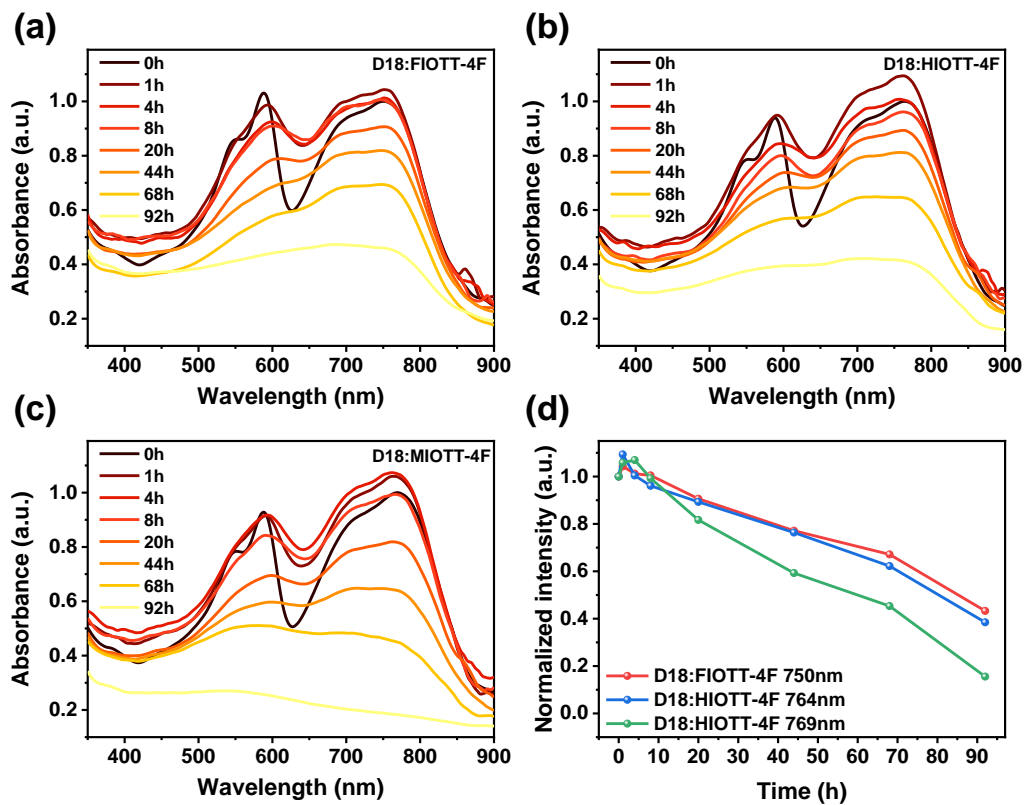

**Fig. S34** The absorption spectra variation of a-c) blend films during the illuminating process. d) The change of absorption intensity versus photoaging time.

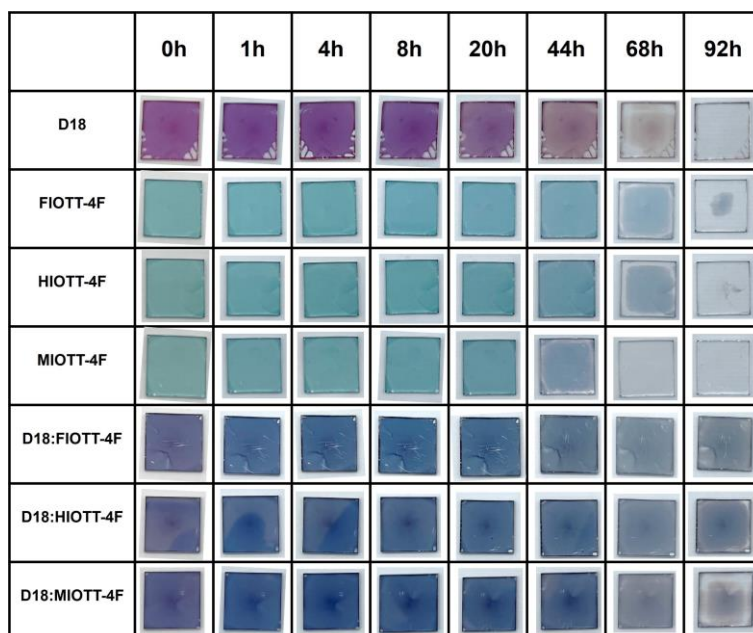

**Fig. S35** Digital photos of different films in the photodegradation process.

## Reference

- 1 Y. Shen, A. R. Hosseini, M. H. Wong and G. G. Malliaras, *ChemPhysChem*, 2004, **5**, 16-25.
- 2 L. Li, D. Qiu, J. Shi and Y. Li, *Org. Lett.*, 2016, **18**, 3726-3729.
- 3 P. A. Wender and D. Staveness, *Org. Lett.*, 2014, **16**, 5140-5143.
- 4 H. Fu, J. Yao, M. Zhang, L. Xue, Q. Zhou, S. Li, M. Lei, L. Meng, Z. G. Zhang and Y. Li, *Nat. Commun.*, 2022, **13**, 3687.
- 5 J. Yao, T. Kirchartz, M. S. Vezie, M. A. Faist, W. Gong, Z. He, H. Wu, J. Troughton, T. Watson, D. Bryant and J. Nelson, *Phys. Rev. Appl.*, 2015, **4**, 014020.
- 6 J. Liu, S. Chen, D. Qian, B. Gautam, G. Yang, J. Zhao, J. Bergqvist, F. Zhang, W. Ma, H. Ade, O. Inganäs, K. Gundogdu, F. Gao and H. Yan, *Nat. Energy*, 2016, **1**, 16089.
